# Supplementary material for: Phosphorylation of the VAR2CSA extracellular region is associated with enhanced adhesive properties to the placental receptor CSA
Source: PubMed Central journal article supplement (PMC6586358; doi:10.1371/journal.pbio.3000308), 2019-06-10
Supplement: pbio.3000308.s006.pdf [file pbio.3000308.s006.pdf]

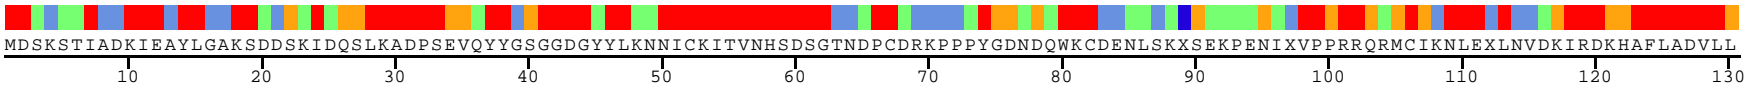

|                           |                                                                                                                                           |     |
|---------------------------|-------------------------------------------------------------------------------------------------------------------------------------------|-----|
| ALB01044.1                | MD - KSS IANKIEAYLGAKSDDSKIDQSLKADPSEVQY YGSGGDGYLLRKNICKITVNHSDSGTNDPCDRKELSYGDI DEWKCAI ILSKVSEKPEVNFVPPRRQRMCIKNLENLKF DKIRDKHAFLADVLL | 129 |
| ALB01053.1                | MD - KSS IANKIEAYLGAKSDDSKIDQSLKADPSEVQY YGSGGDGYLLRKNICKITVNHSDSGTNDPCDRKELSYGDI DEWKCAI ILSKVSEKPEVNFVPPRRQRMCIKNLENLKF DKIRDKHAFLADVLL | 129 |
| ETW56275.1                | MDSTSTIANKIEAYLGAKSDDSKIDELLKADPSEVQY YRSGGDGYLLKNNICKITVNHSDSGTNDPCDSIPPPYGDNDQWKCAI ILSKVSEKPEVNFVPPRRQHMCIKNLEKLVNVDKIRDKHAFLADVLL     | 130 |
| ALB01048.1                | MDSTSTIANKIEAYLGAKSNDKIDQSLKADPSEVQY YGSGGDGYLLKNNICKITVNHSDSGKYDPCDRKELSYGDI DEWKCCQNSSDGSSEKPEVNFVPPRRQHMCIKNLENLKF DKIRDKHAFLADVLL     | 130 |
| ALB01041.1                | MDSTSTIGDKIEEYLGAKSDESNI EQSLKADPSKVQY YGSGGDGYLLKNNICKITVNHSDSGKYEPCDSIPPPYGDNDQWKCENLYKVEKPEVNFVPPRRQRMCIKNLEKLVNVDKIRDKHAFLADVLL       | 130 |
| ALB01039.1                | MDSTSTIGDKIEEYLGAKSDESNI EQSLKADPSKVQY YGSGGDGYLLKNNICKITVNHSDSGKYEPCDSIPPPYGDNDQWKCENLYKVEKPEVNFVPPRRQRMCIKNLEKLVNVDKIRDKHAFLADVLL       | 130 |
| ALB01056.1                | MDSTSTIANKIEAYLGAKSDESNI DQSLKADPSEVQY YRSGGDGYLLKNNICKITVNHSDSGKYDPCDRKELSYGDI DEWKCAI ILSKVSEKPEVNFVPPRRQRMCIKNLEKLVNVDKIRDKHAFLADVLL   | 130 |
| KNC35427.1                | MDSTSTIANKIEAYLGAKSDDSKIDELLKADPSEVEY YRSGGDGYLLKNNICKITVNHSDSGKYDPCCKKLPYGDNDQWKCENLYKASENNKNI FVPPRRQRMCIKNLENLKF DKIRDKHAFLADVLL       | 130 |
| ALB01046.1                | MDSTSTIANKIEAYLKEKSNESKIDQSLKADPSEVQY YGSGGDGYLLKNNICKITVNHSDSGTNDPCENKLLPYGDNDQWKCENLYKASEKPEVICVPPRRQRMCIKNLEKLVNVEKIRDKHAFLADVLL       | 130 |
| ALB01037.1                | MDSTSTIANKIEAYLGAKSDESNI DQSLKADPSEVQY YRSGGDGYLLKNNICKITVNHSDSGTNDPCDSIPPPYGDNDQWKCENLYKASEKPEVICVPPRRQRMCIKNLEKLVNVDKIRDKHAFLADVLL      | 130 |
| ALB01055.1                | MDSKTTTIAEKIEAYLEKKSNDKIDQSLKADPSEVQY YRSGGDGYLLKNNICKITVNHSDSGKYDPCDRKELSYGDNQWKCQNSSDGSSEKPEVICVPPRRQRMCIKNLENLKF DKIRDKHAFLADVLL       | 130 |
| AAQ73924.1                | MD - KSSIGDKIEAYLEKKSDESIEQSLKADPSEVEY YRSGGDGYLLRKNICKITVNHSDSGKYEPCDRKELSYGDI DEWKCCQNSSDGSSEKPEVICVPPRRQRMCIKNLENLKF DKIRDNNAFLADVLL   | 129 |
| ALB01042.1                | MD - KSSIGDKIEEYLKESNDKIDQSLKADPSEVQY YGSGGDGYLLKNNICKITVNHSDSGKYEPCDSIPPPYGDNDQWKCENLSKVSEKPEVICVPPRRQRMCIKNLENLKF DKIRDKHAFLADVLL       | 129 |
| AJD77410.1                | MDSKTTTIAEKIEEYLKESNDKIDQSLKADPSEVQY YGSGGDGYLLKNNICKITVNHSDSGTNDPCCKKLLPYGDNDQWKCENLKFASGNHKNICVPPRRQHMCIKNLENLKF DKIRDKHAFLADVLL        | 130 |
| EWC75615.1                | MDSTSTIGDKIEEYLKESDESNI DQSLKADPSKVQY YGSGGDGYLLKNNICKITVNHSDSGKYEPCDSIPPPYGDNDQWKCENLYKASGNHKNIFVPPRRQHMCIKNLEKLVNVEKIRDKHAFLADVLL       | 130 |
| ALB01054.1                | MDSTSTIAEKIEAYLGAKSNEPNIDQSLKADPSKVQY YRSGGDGYLLKNNICKITVNHSDSGKQNEP - YGTNQTWKCAI ILSKVSEKPEVNFVPPRRQRMCIKNLEKLVNVDKIRDKHAFLADVLL        | 129 |
| ALB01057.1                | MDSTSTIANKIEAYLEKKSNDKIDQSLKADPSEVQY YGSGGDGYLLKNNICKITVNHSDSGTNDPCDSIPPPYGDIDEWKCAI ILSKVSEKPEVNFVPPRRQRMCIKNLEKLVNVDKIRDKHAFLADVLL      | 130 |
| ALB01040.1                | MDSTSTIGDKIEEYLKESDESNI DQSLKADPSEVQY YGSGGDGYLLKNNICKITVNHSDSGTNDPCDSIPPPYGDNDQWKCENLKFASGNHKNICVPPRRQHMCIKNLEKLVNVDKIRDKHAFLADVLL       | 130 |
| ETW41644.1                | MDSTSTIGDKIEAYLGAKSDDSKIDQSLKADPSEVQY YRSGGDGYLLKNNICKITVNHSDSGTNDPCDRIPPPYDNDQWKCENLSKVSEKPEVICVPPRRQRMCIKNLEKLVNVDKIRDKHAFLADVLL        | 130 |
| ALB01043.1                | MDSTSTIGDKIEEYLKESDESNI DQSLKADPSEVQY YGSGGDGYLLKNNICKITVNHSDSGTNDPCDSIPPPYGDNDQWKCENLKFASGNHKNICVPPRRQHMCIKNLEKLVNVDKIRDKHAFLADVLL       | 130 |
| EUT82883.1                | MD - KSSIGDKIEAYLEKKSDESNI EQSLKADPSEVQY YGSGGDGYLLRKNICKITVNHSDSGTNDPCDRKELSYGDI DEWKCAI ILSKVSEKPEVNFVPPRRQRMCIKNLENLKF DKIRDKHAFLADVLL | 129 |
| ALB01038.1                | MD - KSSIGDKIEAYLEKKSDESNI DQSLKADPSEVQY YRSGGDGYLLRKNICKITVNHSDSGTNDPCDSIPPPYGDNDQWKCQNSSDGSSEKPEVICVPPRRQRMCIKNLENLKF DKIRDKHAFLADVLL   | 129 |
| ALB01058.1                | MD - KSSIGDKIEAYLEKKSDESNI DQSLKADPSEVQY YRSGGDGYLLRKNICKITVNHSDSGTNDPCDSIPPPYGDNDQWKCQNSSDGSSEKPEVICVPPRRQRMCIKNLENLNFVERIRDKHAFLADVLL   | 129 |
| ALB01059.1                | MDSTSTIADKIEAYLGAKSDESNI EQSLKADPSEVQY YGSGGDGYLLKNNICKITVNHSDSGTNDPCCKKLLPYGDNDQWKCQNSSDGSSEKPEVICVPPRRQRMCIKNLENLKF DKIRDKHAFLADVLL     | 130 |
| KNG76633.1                | MDSKTTTIAEKIEAYLGAKSDDSKIDQSLKADPSEVQY YGSGGDGYLLKNNICKITVNHSDSGTNDPCCKKLLPYGDNDQWKCENLYKASENNKNI FVPPRRQRMCIKNLEKLVNVEKIRDKHAFLADVLL     | 130 |
| ALB01051.1                | MDSTSTIGDKIEEYLGAKSDESNI EQSLKADPSEVQY YGSGGDGYLLKNNICKITVNHSDSGKYEPCDSIPPPYGDNDQWKCENLYKVEKPEVNFVPPRRQRMCIKNLEKLVNVEKIRDKHAFLADVLL       | 130 |
| ALB01049.1                | MD - KSSIGDKIEEYLKESDDSKIDELLKADPSEVQY YRSGGDGYLLKNNICKITVNHSDSGKYDPCDRIPPPYDNDQWKCENLYKASENNKNI FVPPRRQRMCIKNLENLKF DKIRDKHAFLADVLL      | 129 |
| EWC75604.1                | MD - KSSIGDKIEAYLEKKSDESNI DQSLKADPSEVQY YRSGGDGYLLRKNICKITVNHSDSGTNDPCDSIPPPYGDNDQWKCENLSKVSEKPEVICVPPRRQRMCIKNLEKLVNVEKIRDKHAFLADVLL    | 129 |
| ALB01045.1                | MD - KSS IANKIEAYLKEKSDSKIDQSLKADPSEVQY YGSGGDGYLLKNNICKITVNHSDSGTNDPCCKKLLPYGDNDQWKCENLSKVSEKPEVICVPPRRQRMCIKNLEKLVNVEKIRDKHAFLADVLL     | 129 |
| ALB01047.1                | MDSKTTTIAEKIEEYLKESNDKIDQSLKADPSEVQY YGSGGDGYLLKNNICKITVNHSDSGKYEPCDSIPPPYGDNDQWKCENLKFASGNHKNICVPPRRQHMCIKNLEKLVNVDKIRDKHAFLADVLL        | 130 |
| 7G8.pro                   | MD - KSSIGDKIEEYLKESDDSKIDELLKADPSEVEY YRSGGDGYLLKNNICKITVNHSDSGKYEPCDRIPPPYGDNDQWKCQNLKASENNKNIFVPPRRQRMCIKNLENLNFVERIRDKHAFLADVLL       | 129 |
| 124_8.pro                 | MDSTSTIANKIEAYLKEKSNESNI DQSLKADPSEIDY YNFGGDGYLLRKNICKITVNHSDSGTNDPCDRKELSYGDNQWKCQNSSDGSSEKPEVICVPPRRQRMCIKNLEKLVNVDKIRDKHAFLADVLL      | 130 |
| indo.pro                  | MDSKTTTIAEKIEAYLGAKSNDKIDQSLKADPSEVQY YRSGGDGYLLKNNICKITVNHSDSGTNDPCDRKELSYGDI DEWKCEENLYKASENNKNI FVPPRRQRMCIKNLEKLVNVDKIRDKHAFLADVLL    | 130 |
| KMWII.pro                 | MD - KSSIGDKIEAYLEKKSNDKIDQSLKADPSEVQY YRSGGDGYLLKNNICKITVNHSDSGTNDPCDRKELSYGDI DEWKCEENLYKASENNKNI FVPPRRERLCTYNLEKLVNVEKIRDKHAFLADVLL   | 129 |
| M24.pro                   | MDSKTTIADKIEAYLGAKSDDSKIDQSLKADPSEVQY YGSGGDGYLLKNNICKITVNHSDSGTNDPCCKKLLPYGDNDQWKCENLYKASENNKNI FVPPRRQRMCIKNLENLKF DKIRDKHAFLADVLL      | 130 |
| MTS1.pro                  | MDSKTTTIAEKIEAYLVAKSDDSKIDELLKADPSEIDY YNFGGDGYLLKNNICKITVNHSDSGKYEPCDSIPPPYGDNDQWKCQNSSDGSSEKPEVICVPPRRQRMCIKNLENLKF DKIRDNNAFLADVLL     | 130 |
| P13.pro                   | MDSTSTIADKIEAYLKEKSNDSKIDQSLKADPSEVQY YGSGGDGYLLKNNICKITVNHSDSGTNDPCDRKLLPYGDNDQWKCQNSSDGSSEKPEVICVPPRRQRMCIKNLENLNFVERIRDKHAFLADVLL      | 130 |
| T2C6.pro                  | MDSKTTIADKIEAYLKEKSDSKIDQSLKADPSEVQY YRSGGDGYLLKNNICKITVNHSDSGKYDPCDRKELSYGDI DEWKCAI ILSKVSEKPEVNFVPPRRQRMCIKNLENLNFVERIRDKHAFLADVLL     | 130 |
| VL_S.pro                  | MDSKTTTIAEKIEAYLKEKSNESDI DQSLKADPSEVEY YRSGGDGYLLRKNICKITVNHSDSGMYEPCDRKELSYGDI DEWKCEENLKFASGNHKNICVPPRRQHMCIKNLEKLVNVEKIRDNNAFLADVLL   | 130 |
| WR80.pro                  | MDSKTTTIAEKIEAYLKEKSNESNI EQSLKADPSEVQY YGSGGDGYLLKNNICKITVNHSDSGTNDPCDRIPPPYDNDQWKCQNSSDGSSEKPEVICVPPRRQRMCIKNLEKLVNVEKIRDKHAFLADVLL     | 130 |
| PFL0030cexon1+2.pro       | MD - KSS IANKIEAYLGAKSDDSKIDQSLKADPSEVQY YGSGGDGYLLRKNICKITVNHSDSGTNDPCDRIPPPYGDNDQWKCQNSSDGSSEKPEVICVPPRRQRMCIKNLEKLVNVDKIRDKHAFLADVLL   | 129 |
| A4PFL0030c exon1+2.pro    | MDSTSTIANKIEAYLGAKSDDSKIDELLKADPSEVEY YRSGGDGYLLKNNICKITVNHSDSGKYDPCCKKLPYDNDQWKCQNSSDGSSEKPEVICVPPRRERLCTYNLENLKF DKIRDNNAFLADVLL        | 130 |
| Newdd2var2CSAsequence.pro | MD - KSSIGDKIEAYLEKKSDESIEQSLKADPSEVEY YRSGGDGYLLRKNICKITVNHSDSGKYEPCDRKELSYGDI DEWKCCQNSSDGSSEKPEVICVPPRRQRMCIKNLENLKF DKIRDKHAFLADVLL   | 129 |
| McPFL0030c.pro            | MDSTSTIANKIEAYLGAKSDDSKIDELLKADPSEVQY YRSGGDGYLLKNNICKITVNHSDSGTNDPCDSIPPPYGDNDQWKCQNSSDGSSEKPEVICVPPRRQRMCIKNLEKLVNVDKIRDKHAFLADVLL      | 130 |
| HB3-1var2CSA.pro          | MDSTSTIGDKIEAYLGAKSNDKIDQSLKADPSKVQY YGSGGDGYLLKNNICKITVNHSDSGTNDPCCKKELSYGDNQWKCQNSSDGSSENNKNI FVPPRRQRMCIKNLEKLVNVDKIRDKHAFLADVLL       | 130 |
| HB3-2var2CSA.pro          | MDSKTTTIAEKIEEYLKESNDKIDQSLKADPSEIDY YNFGGDGYLLKNNICKITVNHSDSGTNDPCCKKLLPYGDNDQWKCENLKFASGNHKNICVPPRRQHMCIKNLEKLVNVEKIRDKHAFLADVLL        | 130 |

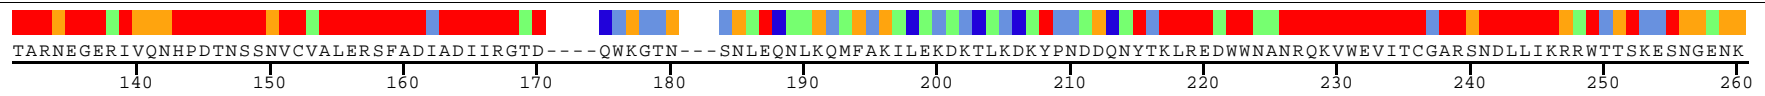

|                           |                                                                                 |                                                     |                                |        |     |
|---------------------------|---------------------------------------------------------------------------------|-----------------------------------------------------|--------------------------------|--------|-----|
| ALB01044.1                | TARNEGEKIVQNHDPDTSNVCVALERSFADLADIIRGTD---QWKGTN---SNLEQNLKQMFAKIREKDS          | TLKNNYSKKDQNYTKLREDWWT                              | TNRQKVVEVITCGARSNDLLIKRRWTTSGK | SNGENK | 252 |
| ALB01053.1                | TARNEGEKIVQNHDPDTSNVCVALERSFADLADIIRGTD---QWKGTN---SNLEQNLKQMFAKIREKDS          | TLKNNYSKKDQNYTKLREDWWT                              | TNRQKVVEVITCGARSNDLLIKRRWTTSGK | SNGENK | 252 |
| ETW56275.1                | TARKEGERIVQNHDPDTSNVCVALERSFADLADIIRGTD---LWKGTN---SNLEKNLQMFKNILEKGSTI         | QSNYSKD-QNYRKLREDWWT                                | TNRQKVVEVITCGARSNDLLIKRGWTTSGK | SNGDNK | 252 |
| ALB01048.1                | TARNEGERIVQNHDPDTSNVCVALERSFADLADIIRGTD---QWKGTN---SNLEKNLQMFAKIREKDS           | TLKNNYSK-DQNYTKLREDWWT                              | TNRQKVVEVITCGARSNDLLIKRRWTTSGK | SNGENK | 252 |
| ALB01041.1                | TARNEGERIVQNHDPDTSNVCNALERSFADIADIIIRGRDENKCETKSPN---NVEELIKNFFGKNYRSNEEYKRYQND | DENYKLLREAWWNNRQKVVEVITCSARSNDLLIKRRWTTSGK          | SNGENK                         | 256    |     |
| ALB01039.1                | TARNEGERIVQNHDPDTSNVCNALERSFADIADIIIRGRDENKCETKSPN---NVEELIKNFFGKNYRSNEEYKRYQND | DENYKLLREAWWNNRQKVVEVITCSARSNDLLIKRRWTTSGK          | SNGENK                         | 256    |     |
| ALB01056.1                | TARNEGERIVQNHDPDTSNVCVALERSFADLADIIRGRDENKCETKSPN---NVEELIKNFFGKNYRSNEEYKRYQND  | DPKYTKLREAWWNNRQKVVEVITCSARSNDLLIKRGWTTSGK          | SNGENK                         | 256    |     |
| KNC35427.1                | TARNEGERIVQNHDPDTSNVCVALERSFADIADIIIRGRDGNKCETKSPN---NVEELIKKFFFKNYRSNEEYKRYQND | DENYKLLREAWWNNRQKVVEVITCSARSNDLLIKRRWTTSGK          | SNGDNK                         | 256    |     |
| ALB01046.1                | TARNEGEKIVQNHDPDTSNVCVALERSFADLADIIRGTD---LWKGTN---SNLEKNLQMFKNILEKDS           | TLKNNYSNDDENYKLLREAWWNNRQKVVEVITCSARSNDLLIKRRWTTSGK | SNGENK                         | 253    |     |
| ALB01037.1                | TARNEGERIVQNHDPDTSNVCVALERSFADLADIIRGRDENKCETKSPN---NVEELIKNFFGKNYRSNEEYKRYQND  | DPKYTKLREAWWNNRQKVVEVITCGARSNDLLIKRGWTTSGK          | SNGDNK                         | 256    |     |
| ALB01055.1                | TARNEGERIILYHPDTSNVCNALERSFADIADIIIRGTD---LWKGTN---SNLEKNLQMFAKILEKDS           | TLKNNYSKKDQNYRKLREDWWT                              | TNRQKVVEVITCSARSNDLLIKRRWTTSGK | SNGENK | 253 |
| AAQ73924.1                | TARNEGERIVQNHDPDTSNVCVALERSFADLADIIRGTDQWKGTN-----KFEPLKQMFAKIRENDKVLQDKY       | PNDDPKYTKLREDWWT                                    | TNRQKVVEVITCSARSNDLLIKLGWTTSGK | SEGDNK | 251 |
| ALB01042.1                | TARNEGERIILYHPDTSNVCNALERSFADIADIIIRGTD---QWKGTN---SNLEQNLKQMFAKIRENDKVLQDKY    | PNDDENYKLLREDWWT                                    | TNRQKVVEVITCGARSNDLLIKRGWTTSGK | SNGENK | 252 |
| ADJ77410.1                | TARNEGERIVQNHDPDTSNVCVALERSFADLADIIRGRDENKCETKSTN---NVEELIKNFFGKNYRSNEEYKRYQND  | DPKYTKLREAWWNNRQKVVEVITCGARSNDLLIKRRWTTSGK          | SNGENK                         | 256    |     |
| EWC75615.1                | TARNEGERIVQNHDPDTSNVCVALERSFADLADIIRGTD---QLKGSN---ILEQNLRRMFKNILEKDV           | LQDKYQNDDENYKLLREDWWT                               | TNRQKVVEVITCSARSNDLLIKRRWTTSGK | SNGENK | 252 |
| ALB01054.1                | TARNEGEKIVQNHDPDTSNVCVALERSFADLADIIRGTD---LWKGTN---SNLEKNLQMFKNILEKDS           | TLKNNYSNDDENYKLLREAWWNNRQKVVEVITCSARSNDLLIKRRWTTSGK | SNGENK                         | 252    |     |
| ALB01057.1                | TARNEGERIVQNHDPDTSNVCNALERSFADIADIIIRGTDQWKGTN---S---NLEKNLQMFARILEKDS          | TLKNNYSKDK-NYRKLREDWWT                              | TNRQKVVEVITCSARSNDLLIKRGWTTSGK | SDRKN  | 252 |
| ALB01040.1                | TARNEGERIVQNHDPDTSNVCNALERSFADIADIIIRGTD---LWKGTN---SNLEQNLRRMFAKIRENDKVLQDKY   | PK-DQNYTKLREDWWT                                    | TNRQKVVEVITCGARSNDLLIKRGWTTSGK | SNGENK | 252 |
| ETW41644.1                | TARNEGERIILYHPDTSNVCVALERSFADLADIIRGTDLWKGTN---S---NLEQNLQMFAKILEKDV            | LQDKYPK-QNYTKLREDWWT                                | TNRQKVVEVITCGARSNDLLIKRRWTTSGK | SNGDNK | 252 |
| ALB01043.1                | TARNEGERIVQNHDPDTSNVCNALERSFADIADIIIRGTD---LWKGTN---SNLEQNLRRMFAKIRENDKVLQDKY   | PK-DQNYTKLREDWWT                                    | TNRQKVVEVITCGARSNDLLIKRGWTTSGK | SNGENK | 252 |
| EUT82883.1                | TARNEGEKIVQNHDPDTSNVCVALERSFADLADIIRGTD---QWKGTN---SNLEQNLKQMFAKILEKDS          | TLKNNYSKKDQNYTKLRESWWT                              | TNRQKVVEVITCGARSNDLLIKRRWTTSGK | SNGENK | 252 |
| ALB01038.1                | TARNEGERIVQNHDPDTSNVCVALERSFADIADIIIRGRDGNKCETKSPN---NVEELIKKFFGKNYRSNEEYKRYQND | DPKYTKLREDWWT                                       | TNRQKVVEVITCSARSNDLLIKRGWTTSGK | SNGENK | 255 |
| ALB01058.1                | TARNEGERIVQNHDPDTSNVCVALERSFADIADIIIRGRDGNKCETKSPN---NVEELIKKFFGKNYRSNEEYKRYQND | DPKYTKLREDWWT                                       | TNRQKVVEVITCSARSNDLLIKRGWTTSGK | SNGENK | 255 |
| ALB01059.1                | TARNEGERIVQNHDPDTSNVCVALERSFADIADIIIRGTD---QLKGSN---ILEQNLKQMFKNILEKDS          | TLKNNYSNDDENYKLLREAWWNNRQKVVEVITCSARSNDLLIKRRWTTSGK | SNGENK                         | 252    |     |
| KMG76633.1                | TARNEGEKIVQNHDPDTSNVCVALERSFADIADIIIRGTD---QWKGTN---SNLEQNLKQMFAKILEKDS         | TLKNNYSKKDQNYTKLREDWWT                              | TNRQKVVEVITCSARSNDLLIKRRWTTSGK | SNGENK | 253 |
| ALB01051.1                | TARNEGERIILYHPDTSNVCVALERSFADLADIIRGRD---GNKCETKSTNNVEELIKKFFGKNYRSNEEYKRYQND   | DPKYTKLREDWWT                                       | TNRQKVVEVITCSARSNDLLIKRRWTTSGK | SNGENK | 256 |
| ALB01049.1                | TARNEGERIILYHPDTSNVCIALERSFADLADIIRGRD---GNKCETKSTNNVEELIKKFFGKNYRSNEEYKRYQND   | DPKYTKLREDWWT                                       | TNRQKVVEVITCSARSNDLLIKRRWTTSGK | SNGDNK | 255 |
| EWC75604.1                | TARNEGEKIVQNHDPDTSNVCVALERSFADIADIIIRGTD---LWKGTN---SNLEQNLQMFKNILEKGSTI        | QSNYSKDK-NYRKLREAWWNNRQKVVEVITCGARSNDLLIKRRWTTSGK   | SNGDNK                         | 251    |     |
| ALB01045.1                | TARNEGEKIVQNHDPDTSNVCVALERSFADLADIIRGTD---QWKGTN---SNLEQNLRRMFAKILEKDS          | TLKNNYSKKDQNYTKLREAWWNNRQKVVEVITCSARSNDLLIKRRWTTSGK | SNGENK                         | 252    |     |
| ALB01047.1                | TARNEGERIVQNHDPDTSNVCVALERSFADLADIIRGRD---ENKCETKSTNNVEELIKNFFGKNYRSNEEYKRYQND  | DPKYTKLREAWWNNRQKVVEVITCGARSNDLLIKRRWTTSGK          | SNGDNK                         | 256    |     |
| 7g8.pro                   | TARNEGERIVQNHDPDTSNVCIALERSFADIADIIIRGRDGNKCETKSTN---NVEELIKKFFGKNYRSNEEYKRYQND | DPKYTKLREDWWT                                       | TNRQKVVEVITCGARSNDLLIKRGWTTSGK | SEGENK | 255 |
| 124_8.pro                 | TARNEGEKIVQNHDPDTSNVCVALERSFADIADIIIRGTD---LWKGTN---SNLEKNLQMFAKILEKDV          | LQDKYPNDDENYKLLREDWWT                               | TNRQKVVEVITCSARSNDLLIKRRWTTSGK | SNGENK | 253 |
| kimdo.pro                 | TARNEGERIILYHPDTSNVCVALERSFADLADIIRGTD---QWKGTN---SNLEKNLQMFAKIRENDKVLQDKY      | PNDDENYKLLREDWWT                                    | TNRQKVVEVITCSARSNDLLIKRRWTTSGK | SEGENK | 253 |
| KMWII.pro                 | TARNEGERIVQNHDPDTSNVCVALERSFADLADIIRGTD---LWKGTN---KFEPLYKQMFAKILEKDS           | TLKNNYSKDKPKYTKLREDWWT                              | TNRQKVVEVITCSARSNDLLIKRRWTTSGK | SNGENK | 251 |
| M24.pro                   | TARNEGEKIVQNHDPDTSNVCVALERSFADIADIIIRGTD---QWKGTN---SNLEQNLKQMFAKIREKDS         | TLKNNYSK-DQNYRKLREDWWT                              | TNRQKVVEVITCGARSNDLLIKRRWTTSGK | SNGENK | 252 |
| MTS1.pro                  | TARNEGERIVQNHDPDTSNVCIALERSFADLADIIRGRDGNKCETKSPN---NVEELIKKFFFKNYRSNEEYKRYQND  | DPKYTKLREDWWT                                       | TNRQKVVEVITCGARSNDLLIKRGWTTSGK | SNGENK | 256 |
| p13.pro                   | TARNEGERIILYHPDTSNVCVALERSFADLADIIRGTDQWKGTN---S---NLEQNLQMFKNILEKDV            | LQDKYQNDDENYKLLRESWWT                               | TNRQKVVEVITCSARSNDLLIKRGWTTSGK | SEGENK | 253 |
| T2C6.pro                  | TARNEGERIVQNHDPDTSNVCVALERSFADLADIIRGTD---QWKGTN---SNLEKNLQMFAKIRENDKVLQDKY     | PNDDENYKLLREDWWT                                    | TNRQKVVEVITCGARNNDLLIKRRWTTSGK | SNGENK | 253 |
| V1_S.pro                  | TARNEGERIILYHPDTSNVCNALERSFADLADIIRGRDENKCETKSPN---NVEELIKNFFGKNYRSNEEYKRYQND   | DPKYTKLREAWWNNRQKVVEVITCSARSNDLLIKRRWTTSGK          | SNGDNK                         | 256    |     |
| WR80.pro                  | TARNEGERIVQNHDPDTSNVCVALERSFADIADIIIRGTD---LWKGTN---SNLEQNLKQMFAKILEKDV         | LQDKYPK-NYTKLREAWWNNRQKVVEVITCSARSNDLLIKRRWTTSGK    | SNGDNK                         | 252    |     |
| PFL0030cexon1+2.pro       | TARNEGERIVQNHDPDTSNVCNALERSFADIADIIIRGTD---LWKGTN---SNLEQNLKQMFAKIRENDKVLQDKY   | PK-DQNYRKLREDWWT                                    | TNRQKVVEVITCGARSNDLLIKRGWTTSGK | SNGDNK | 251 |
| A4PFL0030c exon1+2.pro    | TARNEGEKIVQNHDPDTSNVCNALERSFADLADIIRGTD---QWKGTN---SNLEKNLQMFAKIRENDKVLQDKY     | PK-DQYTKLREAWWNNRQKVVEVITCGARSNDLLIKRGWTTSGK        | SDRKN                          | 252    |     |
| Newdd2var2CSAsequence.pro | TARNEGERIVQNHDPDTSNVCVALERSFADLADIIRGTDQWKGTN-----KFEPLKQMFAKIRENDKVLQDKY       | PNDDPKYTKLREDWWT                                    | TNRQKVVEVITCGARSNDLLIKLGWTTSGK | SEGDNK | 251 |
| McPFL0030c.pro            | TARKEGERIVQNHDPDTSNVCNALERSFADIADIIIRGTD---LWKGTN---SNLEKNLQMFKNILEKGSTI        | QSNYSKDK-QNYRKLREDWWT                               | TNRQKVVEVITCGARSNDLLIKRGWTTSGK | SNGDNK | 252 |
| HB3-1var2CSA.pro          | TARNEGERIILYHPDTSNVCVALERSFADIADIIIRGTD---QLKGSN---ILEQNLKQMFAKIREKDV           | LQDKYPNDDENYKLLREDWWT                               | TNRQKVVEVITCSARSNDLLIKRRWTTSGK | SEGENK | 252 |
| HB3-2var2CSA.pro          | TARNEGERIVQNHDPDTSNVCVALERSFADLADIIRGRDENKCETKSTN---NVEELIKNFFGKNYRSNEEYKRYQND  | DPKYTKLREAWWNNRQKVVEVITCGARSNDLLIKRRWTTSGK          | SNGDNK                         | 256    |     |

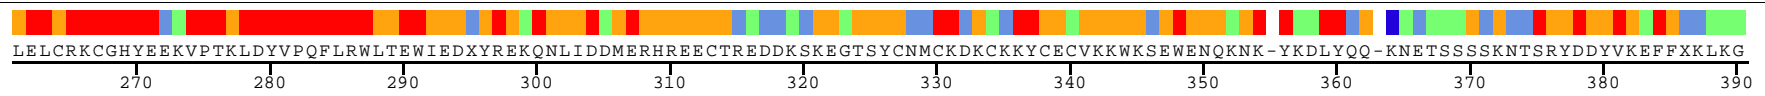

ALB01044.1 LELCRKCGHYEEKVPTKLDYVPPQLRWLWTEWIEDFYREKQNLIDGMRHREECTREDDKCKEGTSCYNMCKEKHTTKYCECVKKWKTEWENQKNK-YKDLYQQ-ENETSQ--KNTSRYDDYVKEFFKFKG 378  
ALB01053.1 LELCRKCGHYEEKVPTKLDYVPPQLRWLWTEWIEDFYREKQNLIDGMRHREECTREDDKCKEGTSCYNMCKEKHTTKYCECVKKWKTEWENQKNK-YKDLYQQ-ENETSQ--KNTSRYDDYVKEFFKFKG 378  
ETW56275.1 LELCRKCGHYEEKVPTKLDYVPPQLRWLWTEWIEDLYREKQNLIDDMERHREECTRKNVDSKEGTSCYCTCKDKCKKCYCECVKKWKTEWENQKNK-YKDLYKDKRKKSS-AKHASRYDDYVKDFPFKLE 380  
ALB01048.1 LELCRKCGHYEEKVPTKLDYVPPQLRWLWTEWIEDFYREKQNLIDDMERHREECTSEDHKCKEGTSCYCTCKDKCKKCYCECVKKWKTEWENQKNK-YTELYEQ-ENETSSSSKKKSRYDDYVKDFPFKLE 380  
ALB01041.1 LELFRKCGHYEEKVPTKLDYVPPQLRWLWTEWIEDLYREKQNLIDDMERHREECTREDDKCKEVTSYCNMCKDKCKKCYCECVKKWKSEWENQKNK-YKDLYQQNKNETSSSSKNSRYDDYVKDFPFKLE 385  
ALB01039.1 LELFRKCGHYEEKVPTKLDYVPPQLRWLWTEWIEDLYREKQNLIDDMERHREECTREDDKCKEVTSYCNMCKDKCKKCYCECVKKWKSEWENQKNK-YKDLYQQNKNETSSSSKNSRYDDYVKDFPFKLE 385  
ALB01056.1 LELCRKCGHYEEKVPTKLDYVPPQLRWLWTEWIEDLYREKQNLIDDMERHREECTREDDKCKEVTSYCNMCKEKHTTKYCEVFNKWKTEWENQKNK-YKDLYQQ-ENETS SSPKKKSRYDDYVKEFFKFKG 384  
KNC35427.1 LELCRKCGHYEEKVPTKLDYVPPQLRWLWTEWIEDFYREKQNLIDDMERHREECTRKNVDSKEGTSCYCTCKDKCKKCYCECVKKWKTEWENQKNK-YNDLYQQE-NETS SSKKKSRYDDYVKEFFKFKG 384  
ALB01046.1 LELCRKCGHYEEKVPTKLDYVPPQLRWLWTEWIEDFYREKQNLIDDMERHREECTSEDHKCKEVTSYCTNCKEKCKKYCECVKKWKSEWKNQENK-YKELYEQ-ENKTS SSKKKSRYDDYVKDFPFKLE-E 380  
ALB01037.1 LELCRKCGHYEGKVPPTKLDYVPPQLRWLWTEWIEDLYREKQNLIDDMERHREECTSEDHKCKEVTSYCTNCKEKCKKYCECVKKWKTEWENQKNK-YTELYEQ-ENETS--QKNTSRYDNYVKEFFKFKG 382  
ALB01055.1 LELCRKCGHYEEKVPTKLDYVPPQLRWLWTEWIEDFYREKQNLIDDMERHREECTREDDKCKEVTSYCNMCKEKHTTKYCECVKKWKSEWKNQENK-YKDLYEQNKNETSSSSKNTSRYDDYVKEFFKLE-E 381  
AAQ73924.1 LELCRKCGHYEEKVPTKLDYVPPQLRWLWTEWIEDFYREKQNLIDGMRHREECTRKNVDSKEGTSCYCTNCKEKCKKYCEVFNKWKSEWENQKNK-YNDLYQQE-NKTS SSKKKSRYDDYVKEFFKFKG 379  
ALB01042.1 LELCRKCGHYEEKVPTKLDYVPPQLRWLWTEWIEDFYREKQNLIDDMERHREECTREYDKCKEGAS YCNMCKDKCKKCYCECVKKWKSEWENQKNK-YKDLYQQNKNETSSSSKNTSRYDNYVKEFFKLE 381  
ADJ77410.1 LELCRKCGHYEEKVPTKLDYVPPQLRWLWTEWIEDFYREKQNLIDDMERHREECTSEDHKCKEVTSYCTNCKEKCKKYCECVKKWKSEWENQKNK-YTELYEQNKNETSSSSKNTSRYDDYVKEFFKLE 385  
EWC75615.1 LELFRKCGHYEEKVPTKLDYVPPQLRWLWTEWIEDLYREKQNLIDDMERHREECTREYDKCKEGTSCYCTNCKEKCKKYCECVFNKWKSEWENLKNK-YKELYEQ-ENKTS SSKKKSRYDDYVKEFFKFKG 380  
ALB01054.1 LELCRKCGHYEEKVPTKLDYVPPQLRWLWTEWIEDLYREKQNLIDDMERHREECTSEDHKCKEVTSYCTNCKEKHTTKYCEVFNKWKSEWKNQKNK-YKELYEQNKNETSSSAKHASRYDDYVKDFPFKLE 381  
ALB01057.1 FELCRKCGHYEGKVPPTKLDYVPPQLRWLWTEWIEDLYREKQNLIDDMERHREECTRKYVESKGVTSYCNMCKDKCKKCYCECVKKWKSEWENQKNK-YKDLYQQNKNETSSSSKNTSRYDDYVKEFFKLE 381  
ALB01040.1 LELCRKCGHYEEKVPTKLDYVPPQLRWLWTEWIEDLYREKQNLIDDMERHREECTRKNVDSKEGTSCYNMCKEKHTTKYCECVKKWKSEWENQKNK-YKDLYQQ--ENETS QKNTSRYDNYVKEFFKFKG 378  
ETW41644.1 LELCRKCGHYEEKVPTKLDYVPPQLRWLWTEWIEDLYREKQNLIDDMERHREECTSEDDKCKEGTSCYCTNCKEKHTTKYCECVKKWKTEWENQKNK-YKDLYQQE-NETS SSKKKSRYDDYVKEFFKFKG 380  
ALB01043.1 LELCRKCGHYEEKVPTKLDYVPPQLRWLWTEWIEDLYREKQNLIDDMERHREECTRKNVDSKEGTSCYNMCKEKHTTKYCECVKKWKSEWENQKNK-YKDLYQQ--ENETS QKNTSRYDNYVKEFFKFKG 378  
EUT82883.1 LELCRKCGHYEEKVPTKLDYVPPQLRWLWTEWIEDLYREKQNLIDGMRHREECTREDDKCKEVTSYCNMCKDKCKKCYCECVKKWKTEWENQKNK-YKDLYQQNKNETSSSSKNTSRYDDYVKEFFKLE 381  
ALB01038.1 LELCRKCGHYEEKVPTKLDYVPPQLRWLWTEWIEDLYREKQNLIDDMERHREECTSEDHKCKEVTSYCTNCKEKCKKYCECVKKWKSEWENQKNK-YKDLYQQ-ENETS SSKKKSRYDDYVKDFPFKFKG 383  
ALB01058.1 LELCRKCGHYEEKVPTKLDYVPPQLRWLWTEWIEDLYREKQNLIDDMERHREECTSEDHKCKEVTSYCTNCKEKCKKYCECVKKWKSEWENQKNK-YKDLYEQ-ENETS SSKKKSRYDDYVKDFPFKFKG 383  
ALB01059.1 LELCRKCGHYEEKVPTKLDYVPPQLRWLWTEWIEDLYREKQNLIDGMRHREECTSQDDKSNEGTSCYCTNCKEKCKKYCECVKKWKTEWENQKNK-YNDLYQQKNETSSSSKKSRYDDYVKEFFKLE 381  
KNG76633.1 LELFRKCGHYEEKVPTKLDYVPPQLRWLWTEWIEDFYREKQNLIDGMRHREECTSEDHKCKEGTSCYCNMCKEKHTTKYCECVKKWKTEWENQKNK-YKDLYEQNKNETSSSSKNTSRYDDYVKEFFKFKG 382  
ALB01051.1 LELCRKCGHYEEKVPTKLDYVPPQLRWLWTEWIEDLYREKQNLIDDMERHREECTRKYVESKGVTSYCNMCKEKHTTKYCECVKKWKSEWENQKNK-YKDLYQQENETS SSKNT--SRDNYVKEFFKFKG 384  
ALB01049.1 LELFRKCGHYEEKVPTKLDYVPPQLRWLWTEWIEDFYREKQNLIDRLEENCKKYKGNVNCVNGTENSACKDQCVCYCTFIRNRKNHWEQKCKKYYKSLYQDVGSSDSSSLYVPSVDDNVKFEFFKFKG 385  
EWC75604.1 LELCRKCGHYEEKVPTKLDYVPPQLRWLWTEWIEDFYREKQNLIDRLEYYCEKCNQKGNVNCVNGTENSACKDQYVKYCTFIRNRKNHWEQKCKKYYKSLYQDVGSSDSSSLYVPSVDDNVKFEFFKFKG 380  
ALB01045.1 LELCRKCGHYEEKVPTKLDYVPPQLRWLWTEWIEDFYREKQNLIDDMERHREECTREDDKCKEGTSCYNMCKEKHTTKYCECVKKWKTEWENQKNK-YTELYEQNKNETS--QKNTSRYDNYVKEFFKFKG 379  
ALB01047.1 LELCRKCGHYEEKVPTKLDYVPPQLRWLWTEWIEDFYREKQNLIDRLEYYCEKCNQKGNVNCVNGTENSACKDQCVCYCTFIRNRKNHWEQKCKKYYKSLYQDVGSSDSSSLYVPSVDDNVDFLQKFKG 385  
7G8.pro LELCRKCGHYEEKVPTKLDYVPPQLRWLWTEWIEDLYREKQNLIDDMERHREECTSEDHKCKEGTSCYCNMCKDKCKKCYCECVKKWKSEWENQKNK-YKDLYQQ-ENETS SSKKKSRYDDYVKEFFKFKLE 383  
124\_8.pro LELCRKCGHYEGKVPPTKLDYVPPQLRWLWTEWIEDLYREKQNLIDDMERHREECTREYDKCKEVTSYCNMCKEKCKKYCECVKKWKTEWENQENK-YNDLYKDK-KRKKSSAKHASRYDNYVKEFFKFKG 381  
indo.pro LELCRKCGHYEGKVPPTKLDYVPPQLRWLWTEWIEDFYREKQNLIDDMERHREECTSEDHKCKEVTSYCTNCKEKHTTKYCECVKKWKSEWENQKNK-YTELYEQ-ENETS SSKKKSRYDDYVKEFFKFKG 381  
KMWII.pro LELCRKCGHYEEKVPTKLDYVPPQLRWLWTEWIEDLYREKQNLIDDMERHREECTRKYVESKGVTSYCNMCKDKCKKCYCECVKKWKTEWENQKNK-YNDLYQQE-NETS SSKKKSRYDDYVKDFPFKFKG 379  
M24.pro LELFRKCGHYEEKVPTKLDYVPPQLRWLWTEWIEDFYREKQNLIDGMRHREECTSEDDKCKEVTSYCNMCKDKCKKCYCECVKKWKTEWENQKNK-YKDLYEQNKNETSSSSKKSRYDDYVKEFFKFKG 381  
MTS1.pro LELCRKCGHYEGKVPPTKLDYVPPQLRWLWTEWIEDFYREKQNLIDDMERHREECTSEDDKCKEGTSCYCNMCKDKCKKCYCECVKKWKSEWENQKNK-YKDLYQQ-ENETS SSKKKSRYDDYVKEFFKFKG 384  
p13.pro LELCRKCGHYEGKVPPTKLDYVPPQLRWLWTEWIEDFYREKQNLIDDMERHREECTRKYVESKGVTSYCNMCKEKHTTKYCECVKKWKTEWENQKNK-YKDLYEQNKNETSSSPKKKSRYDDYVKEFFKFKLE 382  
T2C6.pro LELFRKCGHYEEKVPTKLDYVPPQLRWLWTEWIEDLYREKQNLIDDMERHREECTREDDKCKEGTSCYCTNCKEKCKKYCECVKKWKSEWENQKNK-YKDLYEQNKNETSSSSKKSRYDNYVKEFFKLE 382  
V1\_S.pro LELFRKCGHYEGKVPPTKLDYVPPQLRWLWTEWIEDFYREKQNLIDDMERHREECTREDDKCKEGTSCYCTNCKEKHTTKYCEVFNKWKSEWENQKNK-YTELYEQ--NKNTS QKNTSRYDDYVKEFFKFKG 383  
WR80.pro LELCRKCGHYEEKVPTKLDYVPPQLRWLWTEWIEDFYREKQNLIDDMERHREECTRKYVESKGVTSYCNMCKEKHTTKYCECVKKWKTEWENQKNK-YKDLYEQNKNETSSSPKKKSRYDDYVKEFFKFKLE 381  
PFL0030cexon1+2.pro LELCRKCGHYEEKVPTKLDYVPPQLRWLWTEWIEDFYREKQNLIDDMERHREECTSEDHKCKEGTSCYCTNCKEKCKKYCECVKKWKSEWENQKNK-YTELYQQNKNETS--KNTSRYDDYVKDFPFKLE 378  
A4PFL0030c exon1+2.pro FELCRKCGHYEEKVPTKLDYVPPQLRWLWTEWIEDFYREKQNLIDDMERHREECTREDDKCKEGTSCYCTNCKEKCKKYCECVKKWKTEWENQKNK-YKDLYQQ--NKNTS QKNTSRYDDYVKDFPFKLE 379  
Newdd2var2CSAsequence.pro LELCRKCGHYEEKVPTKLDYVPPQLRWLWTEWIEDFYREKQNLIDGMRHREECTRKNVDSKEGTSCYCTNCKEKCKKYCEVFNKWKSEWENQKNK-YNDLYQQE-NETS SSKKKSRYDDYVKEFFKFKG 379  
McPFL0030c.pro LELCRKCGHYEEKVPTKLDYVPPQLRWLWTEWIEDLYREKQNLIDDMERHREECTRKNVDSKEGTSCYCTNCKEKCKKYCECVKKWKTEWENQKNK-YKDLYKDKRKKSS-AKHASRYDDYVKDFPFKLE 380  
HB3-1var2CSA.pro LELCRKCGHYEEKVPTKLDYVPPQLRWLWTEWIEDLYREKQNLIDDMERHREECTRKNVDSKEGTSCYCNMCKEKHTTKYCECVKKWKSEWENQKNK-YTELYEQ--ENETS QKNTSRYDDYVKDFPFKFKG 378  
HB3-2var2CSA.pro LELCRKCGHYEEKVPTKLDYVPPQLRWLWTEWIEDLYREKQNLIDDMERHREECTRKNVDSKEGTSCYCNMCKEKHTTKYCECVKKWKSEWENQKNK-YTELYEQ--ENETS QKNTSRYDDYVKDFPFKFKG 382

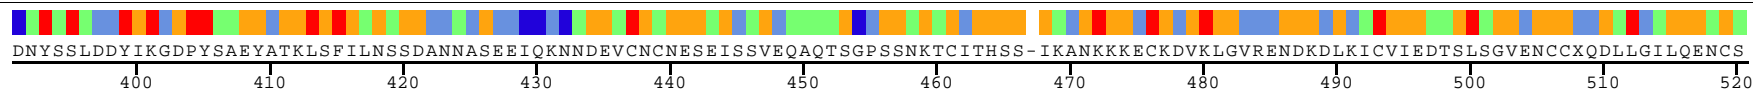

|                           |                                                                                                                                         |     |
|---------------------------|-----------------------------------------------------------------------------------------------------------------------------------------|-----|
| ALB01044.1                | DNYKSLDDYIKGDPYSKEYVTKLSFILNSSDANTSSEKIQKNNDEVNCNNESEISSVEQAQTSDESSNKTCTHSS--IKANKKKECKDVKLVGVRENDKDLRVCVIEHTSLSGVENCXQDLLGILQENCS      | 507 |
| ALB01053.1                | DNYKSLDDYIKGDPYSKEYVTKLSFILNSSDANTSSEKIQKNNDEVNCNNESEISSVEQAQTSDESSNKTCTHSS--IKANKKKECKDVKLVGVRENDKDLRVCVIEHTSLSGVENCXQDLLGILQENCS      | 507 |
| ETW56275.1                | ANYKSLDDYIKGDPYFAEYATKLSFILNSSDANTSSEGETANHNDEACNPNSEISSVEHAQTSDESSNKTCTHSS--IKANKKKECKDVKLVGVRENDKDLRVCVIEHTSLSGVENCXQDLLGILQENCS      | 509 |
| ALB01048.1                | ANYKSLDNYIKGDPYSKEYVTKLSFILNSSDANTSSEKIQKNNDEVNCNPNSEISSVEQAQTSDESSNKTCTHSS--IGANKKKECKDVKLVGINNNDKVLKICVIEDDSLGRVENCXQDLLGILQENCS      | 509 |
| ALB01041.1                | N-YSSLDDYIKDDPYSAQVYTKLSFILNPSDENTENASETPSKYYDEVCPNPNSEISSVEHAQTSDESSSQKACNTHSS--IKTNKKKVECKHVKLVGVRENDKDLKICVIEHTSLSGVENCXQDLLGILQENCS | 513 |
| ALB01039.1                | N-YSSLDDYIKDDPYSAQVYTKLSFILNPSDENTENASETPSKYYDEVCPNPNSEISSVEHAQTSDESSSQKACNTHSS--IKTNKKKVECKHVKLVGVRENDKDLKICVIEHTSLSGVENCXQDLLGILQENCS | 513 |
| ALB01056.1                | NGYSSANSYVKNPYSAEYATKLSFILNSSDANTSSEGETANHNDEVNCNNESEISSVELAPISGPPSNKTCTHSS--IKTNKKKVECKHVKLVGREKDKDLKICVIEDTSLSGVENCXQDLLGILQENCS      | 513 |
| KNC35427.1                | DNYSSLDDYIKGDPYFAEYATKLSFILNPSDENTENASETPSKYYDEACNPNSEISSVEQAQTSDESSNKTCTHSS--IKTNKKKVECKDVKLVGVRENDKDLKICVIEDTSLSGVENCXQDLLGILQENCS    | 513 |
| ALB01046.1                | ANYKSLDNYIKGDPYFAEYATKLSFILNPSDANTSSEGETANHNDEVNCNPNSEISSVEQAQTSDESSNKTCTHSS--IKTNKKKVECKDVKLVGINNNDKDLKICVIEDTSLSGVENCXQDLLGILQENCS    | 509 |
| ALB01037.1                | DNYKSLDDYIKGDPYSAEYATKLSFILNPSDANTSSEGETANHNDEVNCNNESEISSVQQAQTSDESSNKTCTHSS--IGANKKKECKDVKLVGVRENDKDLRVCVIEHTSLSGVENCXQDLLGILQENCS     | 511 |
| ALB01055.1                | ANYKSLDNYIKGDPYFAEYATKLSFILNPSDANTSSEGETANHNDEVNCNPNSEISSVQQAQTSDESSNKTCTHSS--IGANKKKECKDVKLVGVRENDKDLKICVIEHTSLSGVENCXQDLLGILQENCS     | 510 |
| AAQ73924.1                | DNYKSLDNYIKGDPYFAEYATKLSFILNPSDANTSSEGETANHNDEVNCNNESEISSVQQAQTSDESSNKTCTHSS--IKTNKKKVECKDVKLVGINNNDKDLKICVIEDTSLSGVENCXQDLLGILQENCS    | 508 |
| ALB01042.1                | ANYKSLDDYIKGDPYFAEYATKLSFILNSSDANTSSEKIQKNNDEVNCNNESEISSVQQAQTSDESSNKTCTHSS--IKANKKKECKDVKLVGVRENDKDLKICVIEDDSLGRVENCXQDLLGILQENCS      | 510 |
| AJD77410.1                | ANYSSLDDYIKDDPYFAEYATKLSFILNPSDANTSSEGETANHNDEVNCNPNSEISSVEQAQTSDESSNKTCTHSS--IKANKKKECKDVKLVGVRENDKDLKICVIEDTSLSGVENCXQDLLGILQENCS     | 514 |
| EW75615.1                 | NGYSSANSYVKNPYSAEYATKLSFILNPSDANTSSEKIQKNNDEVNCNNESEISSVQQAQTSDESSSQKACI THSF--IGANKKKECKDVKLVGINNNDKDLKICVIEHTSLSGVENCXQDLLGILQENCS    | 509 |
| ALB01054.1                | ANYSSLDNYIKGDPYSKEYVTKLSFILNPSDANTSSEKIQKNNDEVNCNPNSEISSVEHAQTSVLLSQKAYITHSS--IKANKKKECKHVKLVGVRENDKDLKICVIEDDSLGRVENCXQDLLGILQENCS     | 510 |
| ALB01057.1                | ANYSSLDDYIKGDPYFAEYVTKLSFILNSSDANTSSEKIQKNNDEVNCNNESEISSVEQAQTSDESSNKTCTHSS--IKANKKKECKDVKLVGVRENDKDLRVCVIEHTSLSGVENCXQDLLGILQENCS      | 510 |
| ALB01040.1                | DNYSSLDNYIKGDPYFAEYATKLSFILNSSDANTSSEKIQKNNDEVNCNNESEISSVEQAQTSDESSNKTCTHSS--IKTNKKKVECKHVKLVGINNNDKDLKICVIEDDSLGRVENCXQDLLGILQENCS     | 507 |
| ETW41644.1                | DNYSSLDNYIKGDPYFAEYATKLSFILNSSDANTSSEKIQKNNDEVNCNNESEISSVEQAQTSDESSNKTCTHSS--IKANKKKECKDVKLVGINNNDKDLKICVIEDTSLSGVENCXQDLLGILQENCS      | 509 |
| ALB01043.1                | DNYSSLDNYIKGDPYFAEYATKLSFILNSSDANTSSEKIQKNNDEVNCNNESEISSVEQAQTSDESSNKTCTHSS--IKTNKKKVECKHVKLVGINNNDKDLKICVIEDDSLGRVENCXQDLLGILQENCS     | 507 |
| EUT82883.1                | ANYSSLDNYIKGDPYSKEYVTKLSFILNPSDANTSSEKIQKNNDEVNCNPNSEISSVEHAQTSVLLSQKAYITHSS--IKTNKKKVECKHVKLVGVRENDKDLKICVIEDTSLSGVENCXQDLLGILQENCS    | 510 |
| ALB01038.1                | DNYSSLDDYIKDDPYFAEYVTKLSFILNSSDANTSSEKIQKNNDEVNCNNESEISSVQQAQTSDESSNKTCTHSS--IKANKKKECKDVKLVGVRENDKDLRVCVIEHTSLSGVENCXQDLLGILQENCS      | 512 |
| ALB01058.1                | DNYSSLDDYIKDDPYFAEYVTKLSFILNSSDANTSSEKIQKNNDEVNCNNESEISSVQQAQTSDESSNKTCTHSS--IKANKKKECKDVKLVGVRENDKDLRVCVIEHTSLSGVENCXQDLLGILQENCS      | 512 |
| ALB01059.1                | N-YLSDDDYIKDDPYSAEYKLLKFD----NTNAFKESITCNKNVCCSCGNEKLIISEGSSSSSFPGTSSSYQSSIITSNKRKECKQIKFSGNKNMNMNINICSTQDEKLL--VK--LELLKSFCDTCD        | 501 |
| KNG76633.1                | NGYSSANSYIKNPNYSAEYKLLKFD----GPDAFIESPTYNNVCCSTPEKSAKTIDGSSSSSFPGTSSSYQSSIITSNKRKECKQIKFSGNKNMNMNINICSTQDNNLL--VE--FQELLSFCNISG         | 502 |
| ALB01051.1                | DNYSSLDDYIKGDPYSSDGGKLLIFD----NTNAFIESPTYNNVCCSTPEKSAKTIDGSSSSSFPGTSSSYQSSIITSNKRKECAQIKFSGNKNMNMNINICSTQDNNLL--VE--FQELLSKGFCDTCD      | 505 |
| ALB01049.1                | NGYSSANSYVKNPNYSAEYKLLKFD----GPDAFIESPTYNNVCCSTPEKSAKTIDGSSSSSFPGTSSSYQSSIITSNKRKECKQIKFSGNKNMNMNINICSTQDEKLL--VK--LELLKSFCDTCD         | 505 |
| EW75604.1                 | NGYSSANSYIKNPNYSAEYKLLIFD----NTNAFKESITFNKNVCCSCGNEKLIISEGSSSSRFPGTSSSYQSSIITSNKRKECKQIKFSGNKNMNMNINICSTQDEKLL--VK--LELLKSFCDTCD        | 500 |
| ALB01045.1                | NGYSSANSYVKNPNYSSEDGKLLKFD----NTNAFKESITCNKNVCCSCGNEKLIISEGSSSSSFPGTSSSYQSSIITSNKRKECAQIKFSGNKNMNMNINICSTQDNNLL--VK--LELLKSFCDTCD       | 500 |
| ALB01047.1                | NEYSSANSYVKNPNYSSEDGKLLKFD----NTNAFKESITCNKNVCCSCGNEKLIISEGSSSSSFPGTSSSYQSSIITSNKRKECKQIKFSGNKNMNMNINICSTQDNNLL--VK--LELLKSFCDTCD       | 505 |
| 7G8.pro                   | ANYSSLDNYIKDDPYSAEYVTKLSFILNPSDANTSSEKIQKNNDEVNCNPNSEISSVEQAQTSDESSNKTCTHSS--IKANKKKECKDVKLVGVRENDKDLKICVIEDTSLSGVENCXQDLLGILQENCS      | 512 |
| 124_8.pro                 | NGYSSANSYVKNPYSKEYVTKLSFILNPSDANTSSEGETANHNDEVNCNPNSEISSVQQAQTSDESSNKTCTHSS--IGANKKKECKDVKLVGVRENDKDLKICVIEDDSLGRVENCXQDLLGILQENCS      | 510 |
| indo.pro                  | DNYKSLDDYIKGDPYSAEYVTKLSFILNPSDANTSSEKIQKNNDEVNCNNESEISSVQQAQTSDESSNKTCTHSS--IKANKKKECKDVKLVGVRENDKDLRVCVIEHTSLSGVENCXQDLLGILQENCS      | 510 |
| KMWII.pro                 | DNYKSLDDYIKGDPYSAEYVTKLSFILNPSDANTSSEGETANHNDEVNCNPNSEISSVQQAQTSDESSNKTCTHSS--IGANKKKECKDVKLVGVRENDKDLRVCVIEHTSLSGVENCXQDLLGILQENCS     | 508 |
| M24.pro                   | DNYKSLDDYIKGDPYFAEYATKLSFILNSSDANTSSEGETANHNDEVNCNPNSEISSVQQAQTSDESSNKTCTHSS--IKANKKKECKDVKLVGINNNDKDLRVCVIEHTSLSGVENCXQDLLGILQENCS     | 510 |
| MTS1.pro                  | DNYSSLDDYIKDDPYSAEYVTKLSFILNPSDANTSSEKIQKNNDEVNCNPNSEISSVEQAQTSDESSNKTCTHSS--IKANKKKECKDVKLVGVRENDKDLRVCVIEHTSLSGVENCXQDLLGILQENCS      | 513 |
| p13.pro                   | ANYKSLDDYIKDDPYSAEYATKLSFILNPSDANTSSEGETANHNDEVNCNNESEISSVELAPISDSSNKTCTHSS--IGANKKKECKDVKLVGVRENDKDLKICVIEDTSLSGVENCXQDLLGILQENCS      | 511 |
| T2C6.pro                  | ANYKSLDNYIKGDPYSKEYVTKLSFILNPSDANTSSEKIQKNNDEVNCNPNSEISSVEQAQTSDESSNKTCTHSS--IKANKKKECKDVKLVGVRENDKDLKICVIEHTSLSGVENCXQDLLGILQENCS      | 511 |
| V1_S.pro                  | DNYKSLDDYIKDDPYSAEYVTKLSFILNPSDANTSSEKIQKNNDEVNCNNESEISSVQQAQTSDESSNKTCTHSS--IKANKKKECKDVKLVGINNNDKDLRVCVIEHTSLSGVENCXQDLLGILQENCS      | 512 |
| WR80.pro                  | NEYSSANSYIKNPNYSSEDGKLLIFD----NTNAFIESPTYNNVCCSTPEKSAKTIDGSSSSSFPGTSSSYQSSIITSNKRKECKQIKFSGNKNMNMNINICSPDEKLL--VK--LELLKSFCDTCD         | 501 |
| PFL0030cexon1+2.pro       | N-YSSLDNYIKGDPYFAEYATKLSFILNSSDANTSSEKIQKNNDEVNCNNESEISSVEQAQTSDESSNKTCTHSS--IKANKKKECKDVKLVGVRENDKDLRVCVIEHTSLSGVENCXQDLLGILQENCS      | 506 |
| A4PFL0030c exon1+2.pro    | N-YSSLDNYIKGDPYFAEYATKLSFILNPSDANTSSEGETANHNDEVNCNPNSEISSVQQAQTSDESSNKTCTHSS--IKTNKKKVECKDVKLVGVRENDKDLKICVIEDTSLSGVENCXQDLLGILQENCS    | 507 |
| Newdd2var2CSAsequence.pro | DNYKSLDNYIKGDPYFAEYATKLSFILNSSDANTSSETPSKYYDEVCPNPNSEISSVQQAQTSDESSNKTCTHSS--IKTNKKKVECKDVKLVGINNNDKDLRVCVIEHTSLSGVENCXQDLLGILQENCS     | 508 |
| McPFL0030c.pro            | ANYKSLDDYIKGDPYFAEYATKLSFILNSSDANTSSEGETANHNDEVNCNNESEISSVEHAQTSDESSNKTCTHSS--IKANKKKECKHVKLVGVRENDKDLRVCVIEHTSLSGVENCXQDLLGILQENCS     | 509 |
| HB3-1var2CSA.pro          | NGYSSANSYVKNPYSAEYVTKLSFILNSSDANTSSETPSKYYDEVCPNPNSEISSVQQAQTSDESSNKTCTHSS--IKTNKKKVECKDVKLVGINNNDKDLRVCVIEHTSLSGVENCXQDLLGILQENCS      | 507 |
| HB3-2var2CSA.pro          | NEYSSANSYVKNPNYSAEYVTKLSFILNSSDANTSSETPSKYYDEVCPNPNSEISSVQQAQTSDESSNKTCTHSS--IKTNKKKVECKDVKLVGINNNDKDLRVCVIEHTSLSGVENCXQDLLGILQENCS     | 511 |

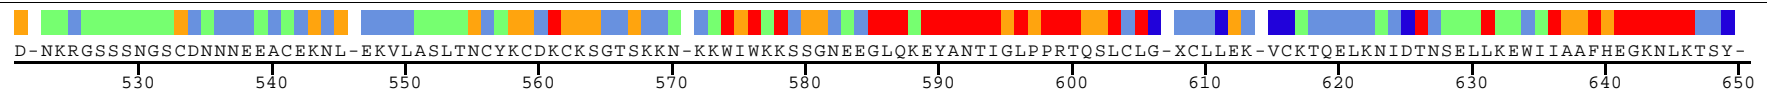

D-NKRGSSSSNGSCDNNNEEACEKNL-EKVLASLTNICYKCDKCKSEQSKNNKNKIWKSSSGKEGGLQKEYANTI GLP PRT QSLCLV-VCLDEK-GKKTQELKNIRTNSELLKKEWIIAAPHGEGKNLKPS-- 632  
D-NKSGSSSSNGSCNKNKQEAACEKNL-EKVLASLTNICYKCDKCKSEQSKNNKNKIWKSSSGKEGGLQKEYANTI GLP PRT QSLCLV-VCLDEK-GKKTQELKNIRTNSELLKKEWIIAAPHGEGKNLKPS-- 632  
D-NKSGSSSSNGSCDNKNEEACEKNL-EKVFASLTNICYKCEKCKSEQSKNNKNKIWKSSSGKEGGLQKEYANTI GLP PRT QSLCLV-VCLDEK-GKKTQELKNIRTNSELLKKEWIIAAPHGEGKNLKPSHE 636  
D-NKSGSSSSNGSCDNKQEAACEKNL-EKVLASLTNICYKCDKCKSEQSKNNNIWIWRKSSSGKEGGLQKEYANTI GLP PRT QSLCLV-VCLDEK-GKKTQELKNIRTNSELLKKEWIIAAPHGEGKNLKPS-- 634  
D-NKRRSSSSNGSCDNKNQDECEKNL-EKVLASLTNICYKCDKCKSGTSTVN-NKIWKKYSVKEGGLQKEYANTI ALP PRT QSLYL--VCLHEK-EGKTQELKNIRTNSELLKKEWIIAAPHGEGKNLKIS-- 636  
D-NKRRSSSSNGSCDNKNQDECEKNL-EKVLASLTNICYKCDKCKSGTSTVN-NKIWKKYSVKEGGLQKEYANTI ALP PRT QSLYL--VCLHEK-EGKTQELKNIRTNSELLKKEWIIAAPHGEGKNLKIS-- 636  
D-NIRGSSSSNGSCDNKNEEACEKNL-EKVFASLTNICYKCDKCKSGTSTVN-NKIWKKYSVKEGGLQKEYANTI ALP PRT QSLCLV-VCLDEK-EGKTQELKNIRTNSELLKKEWIIAAPHGEGKNLKTYY-- 638  
D-NKRGSSSSNGSCDNKNEEACEKNL-DEALASLTNICYKCEKCKSGTSTVN-KKWTRKSSGNEEGLQKEYANTI GLP PRT QSLCL--VCLHEK-EGKTKH-KTISTNSELLKKEWIIAAPHGEGKNLKTSH-- 636  
D-NKRESSSSNGSCNKNQDECEKQKL-DEALASLTNICYKCEKCKSGTSTVN-KKIWKSSGNEEGLQKEYANTI GLS PRT QSLCL--VCLHEK-EGKTQELKNIRTNSELLKKEWIIAAPHGEGKNLKPS-- 633  
D-NKRESSSSNGSCDNKNEEACEKNL-EKVFASLTNICYKCDKCKSEQSKNNKNKIWKSSSGNGEGLQKEYANTI GLP PRT HSLY LGNLRKLEN-VCEDEVKIDNFDTKEKFLAGCLIAAPHGEGKNLKTSS-- 637  
DKNQSGSSSSNGSCDNKNEEACEKNL-DEALASLTNICYKCEKCKSEQSKNNKIWTRKFPNGEGLQKEYANTI GLS PRT QLLYL--VCLHEK-GKKTQELKNIRTNSELLKKEWIIAAPHGEGKNLKR-- 635  
D-NKRGSSSSNGSCDNKNEEACEKNL-EKVFASLTNICYKCDKCKSGTSTVN-KKIWKSSGNEEGLQKEYANTI GLP PRT QSLCL--VCLHEK-EGKTKH-KTISTNSELLKKEWIIAAPHGEGKNLKTSH-- 631  
D-NKRESSSSNGSCNKNQDECEKQKL-EKVFASLTNICYKCEKCKSGTSTVN-SKKIWKSSGNGEGLQKEYANTI GLP PRT QSLCLV-VCLDEK-GKKTQELKNIRTNSELLKKEWIIAAPHGEGKNLKT-- 634  
D-NKRGSSSSNGSCDNKNEEACEKNL-DEALASLTNICYKCDKCKSGTSTVN-KKIWKSSGKEGGLQKEYANTI GLP PRT QSLCLV-VCLHEK-EGKTQELKNIRTNSELLKKEWIIAAPHGEGKNLKP-- 639  
DKNQSGSSSSNGSCDNKNEEACEKNL-EKVLASLTNICYKCDKCKSGTSTVN-KKIWKSSGKEGGLQKEYANTI ALP PRT QSLCL--VCLHEK-EGKTQELKNIRTNSELLKKEWIIAAPHGEGKNLKR-- 634  
D-NKRESSSSNGSCNKNQDECEKQKL-DEALASLTNICYKCDKCKSGTSTVN-KKIWKSSGKEGGLQKEYANTI ALP PRT QSLCLV-VCLDEK-GKKTQELKNIRTNSELLKKEWIIAAPHGEGKNLKTSH-- 635  
D-NKSGSSSSNGSCDNKNEEACEKNL-EKVFASLTNICYKCEKCKSEQSKNNKNKIWKSSSGNGEGLQKEYANTI GLP PRT HSLY LGNLRKLEN-VCEDEVKIDNFDTKEKFLAGCLIAAPHGEGKNLKTYY-- 637  
D-NKRESSSSNGSCNKNQEAACEKNL-DEALASLTNICYKCEKCKSGTSTVN-KKIWKSSGDEKGLQKEYANTI GLP PRT HSLY LGNLRKLEN-VCEDEVKIDNFDTKEKFLAGCLIAAPHGEGKNLKR-- 633  
D-NKRGSSSSNGSCDNKNEEACEKNL-EKVLASLTNICYKCDKCKSGTSTVN-KKIWKSSGKEGGLQKEYANTI GLP PRT QSLCL--VCLHEK-EGKTQELKNIRTNSELLKKEWIIAAPHGEGKNLKTSH-- 633  
D-NKRESSSSNGSCNKNQEAACEKNL-DEALASLTNICYKCEKCKSGTSTVN-KKIWKSSGDEEGLQKEYANTI GLP PRT HSLY LGNLRKLEN-VCEDEVKIDNFDTKEKFLAGCLIAAPHGEGKNLKR-- 633  
D-NKRRSSSSNGSCDNKNQDECEKNL-EKVLASLTNICYKCDKCKSGTSTVN-NKIWKKYSVKEGGLQKEYANTI GLP PRT QSLY LGNLRKLEN-VCEDEVKIDNFDTKEKFLAGCLIAAPHGEGKNLKTYY-- 636  
D-----KNQKCKSEQSKNNKNKIWKSSSGKEGGLQKEYANTI GLP PRT QSLY LGNLRKLEN-VCKGVTDIDNFDTKEKFLAGCLIAAPHGEGKNLKTYY-- 605  
D-----KNQKCKSEQSKNNKNKIWKSSSGKEGGLQKEYANTI GLP PRT QSLY LGNLRKLEN-VCKGVTDIDNFDTKEKFLAGCLIAAPHGEGKNLKTYY-- 605  
I--GIG--VEVVCENNCEEQYKLLPCLKCTVLCNECNKTRCKPLKKEQEKWIWKSSSGKEGGLQKEYANTI ALP PRT QSLCLVCLHEKE--KTQELKNIRTNSELLKKEWIIAAPHGEGKNLKTYY-- 624  
V--NTGG-VEVVCENNCEEQYKLLPCLKCTILTCCKENKTRCKPLKKEQEKWIWKSSSGKEGGLQKEYANTI GLP PRT QSLCLVCLHEKEG-KTQELKNIS--TNSELLKKEWIIAAPHGEGKNLKTSH-- 626  
T--DIG--VEVVCENNCEEQYKLLPCLKCTVLCNECNKTRCKPLKKEQEKWIWKSSSGKEGGLQKEYANTI GLP PRT QSLCLVCLHEKE--GKTQHKTISTNSELLKKEWIIAAPHGEGKNLKTYY-- 627  
T--DIG--VEVVCENNCEEQYKLLPCLKCTILTCCKENKTRCKPLKKEQEKWIWKSSSGNEKGLQKEYANTI GLP PRT QSLCLVCLHEKE--GKTQHKTISTNSELLKKEWIIAAPHGEGKNLKTYY-- 627  
V--NTGG-VEVVCENNCEEQYKLLPCLKCTILTCCKENKTRCKPLKKEQEKWIWKSSSGNEKGLQKEYANTI GLP PRT QSLY LGNLRKLEN-VCLHEK-EGKTQELKNIRTNSELLKKEWIIAAPHGEGKNLKR-- 623  
T--GIG--VEVVCENNCEEQYKLLPCLKCTVLCNECNKTRCKPLKKEQEKWIWKSSSGKEGGLQKEYANTI GLP PRT QSLY LGNLRKLEN-VSKGVTDIDNFDTKEKFLAGCLIAAPHGEGKNLKTSH-- 625  
T--DIG--VEVVCENNCEEQYKLLPCLKCTVLCNECNKTVFKNLKQEQEKWIWKSSSGNEKGLQKEYANTI GLP PRT QSLY LGNLRKLEN-VCKGVTDIDNFDTKEKFLAGCLIAAPHGEGKNLKTYY-- 630  
D-NKRGSSSSNGSCDNKNQDECEKQKL-DEALASLTNICYKCDKCKSGTSTVN-KKIWKSSSGNEKGLQKEYANTI GLP PRT QSLY LGNLRKLEN-VSKGVTDIYDTKEKFLAGCLIAAPHGEGKNLKTSS-- 637  
D-NKSGSSSSNGSCNKNQDECEKQKL-DEALASLTNICYKCDKCKSGTSTVN-KKIWKSSSGNEKGLQKEYANTI GLP PRT QSLY LGNLRKLEN-VCKGVTDIDNFDTKEKFLAGCLIAAPHGEGKNLKISN-- 636  
DKNQSGSSSSNGSCDNKNEEACEKNL-EKVLASLTNICYKCDKCKSGTSTVN-SKKIWKSSSGKEGGLQKEYANTI GLP PRT QSLCLV-VCLDEK-EGKTQELKNIRTNSELLKKEWIIAAPHGEGKNLKPS-- 635  
D-NKRGSSSSNGSCDNKNEEACEKNL-EKVFASLTNICYKCDKCKSGTSTVN-KKIWKSSSGNEKGLQKEYANTI GLP PRT HSLY LGNLRKLEN-VCEDEVKIDNFDTKEKFLAGCLIAAPHGEGKNLKIS-- 634  
D-NKSGSSSSNGSCNKNQEAACEKNL-EKVLASLTNICYKCDKCKSGTSTVN-KKIWKSSSGNEKGLQKEYANTI GLP PRT HSLY LGNLRKLEN-VCEDEVKIDNFDTKEKFLAGCLIAAPHGEGKNLKR-- 636  
D-NKRGSSSSNGSCDNKNEEACEKNL-DEALASLTNICYKCDKCKSGTSTVN-KKIWKSSSGNEKGLQKEYANTI GLP PRT QSLY LGNLRKLEN-VCKGVTDIDNFDTKEKFLAGCLIAAPHGEGKNLKTYY-- 640  
D-NKSGSSSSNGSCDNKNEEACEKNL-ENVFASLTNICYKCDKCKSGTSTVN-KKIWKSSSGNEEGLQKEYANTI GLP PRT HSLY--VCLHEK-EGKTKH-KTISTNSELLKKEWIIAAPHGEGKNLKTSS-- 633  
DKNQSGSSSSNGSCDNKNEEACEKNL-DEALASLTNICYKCDKCKSEQSKNNKNKIWKSSSGKEGGLQKEYANTI GLP PRT QYLCLV-VCLDEK-EGKTQELKNIRTNSELLKKEWIIAAPHGEGKNLKTYY-- 638  
D-NKRGSSSSNGSCDNKNEEACEKNL-DEALASLTNICYKCDKCKSGTSTVN-KKIWKSSSGNEEGLQKEYANTI GLP PRT QSLCL--VCLHEK-EGKTKH-KTISTNSELLKKEWIIAAPHGEGKNLKTSH-- 635  
P--DIG--VEVVCENNCEEQYKLLPCLKCTILTCCKENKTRCKPLKKEQEKWIWKSSSGNEKGLQKEYANTI GLP PRT QSLY LGNLRKLEN-VCKGVTDIDNFDTKEKFLAGCLIAAPHGEGKNLKTSSP-- 626  
D-NKSGSSSSNGSCNKNQEAACEKNL-EKVLASLTNICYKCDKCKSEQSKNNKNKIWKSSSGKEGGLQKEYANTI GLP PRT QSLCLV-VCLDEK-GKKTQELKNIRTNSELLKKEWIIAAPHGEGKNLKPS-- 631  
A4PFL0030c exon1+2.pro D-NKRGSSSSNGSCDNKNQDECEKQKL-EKVFASLTNICYKCDKCKSGTSTVN-KKIWKSSSGNEEGLQKEYANTI GLP PRT QSLY LGNLRKLEN-VCEDEVKIDNFDTKEKFLAGCLIAAPHGEGKNLKR-- 633  
Newd2var2CSAsequence.pro D-NKRGSSSSNGSCDNKNEEACEKNL-EKVFASLTNICYKCEKCKSGTSTVN-KKIWKSSSGNEEGLQKEYANTI GLP PRT QSLCL--VCLHEK-EGKTKH-KTISTNSELLKKEWIIAAPHGEGKNLKTSH-- 631  
McPFL0030c.pro D-NKSGSSSSNGSCDNKNEEACEKNL-EKVFASLTNICYKCEKCKSEQSKNNKNKIWKSSSGKEGGLQKEYANTI GLP PRT QSLCLV-VCLDEK-GKKTQELKNIRTNSELLKKEWIIAAPHGEGKNLKPSHE-- 636  
HB3-1var2CSA.pro DKNQSGSSSSNGSCNKNQDECEKQKL-EKVFASLTNICYKCDKCKSGTSTVN-KKIWKSSSGNEEGLQKEYANTI GLP PRT QSLY LGNLRKLEN-VCKGVTDIYDTKEKFLAGCLIAAPHGEGKNLKTSH-- 634  
HB3-2var2CSA.pro DKNQSGSSSSNGSCNKNQDECEKQKL-EKVFASLTNICYKCDKCKSGTSTVN-KKIWKSSSGNEEGLQKEYANTI GLP PRT QSLY LGNLRKLEN-VCKGVTDIDNFDTKEKFLAGCLIAAPHGEGKNLKTYY-- 638



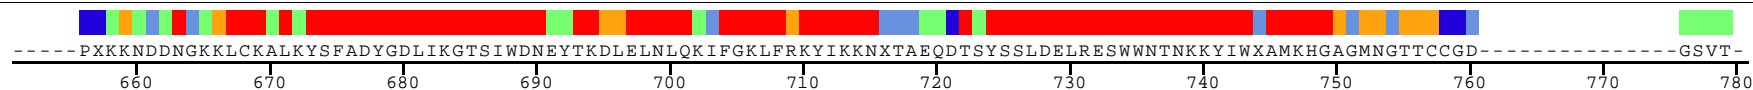

ALB01044.1 -----HEKKNDDNGKKLCKALEYSFADYGDLIKGTSIWDNEYTKDLELNLQKIFGKLFKRYIKKNNTAEQDTSYSSSDELRESWWTNKKYIWLAMKHGAGMNSTTCCGD-----GSVT- 741  
ALB01053.1 -----HEKKNDDNGKKLCKALEYSFADYGDLIKGTSIWDNEYTKDLELNLQKIFGKLFKRYIKKNNTAEQDTSYSSSDELRESWWTNKKYIWLAMKHGAGMNSTTCCGD-----GSVT- 741  
ETW56275.1 KKNDDNGKKLCKDLKYSFADYGDLIKGTSIWDNEYTKDLELNLQKIFGKLFKRYIKKNIASDENTLYSSSDELRESWWTNKKYIWLAMKHGAE MNGTTCNAD-----GSVT- 751  
ALB01048.1 -----LEKKKGDNNKSLCKDLKYSFADYGDLIKGTSIWDNEYTKNVELNLQNNFGKLFKRYIKKNIASDENTLYSSSDELRESWWTNKKYIWTAMKHGAGMNGTMCNAD-----GSVT- 743  
ALB01041.1 -----PQNKNDNGKKLCKALKYSFADYGDLIKGTSIWDNDFTKDLELNLQKIFGKLFKRYIKKNISTEQDPTYSSSDELRESWWTNKKYIWTAMKHGAE MNGTTCGD-----GSVTG 745  
ALB01039.1 -----PQNKNDNGKKLCKALKYSFADYGDLIKGTSIWDNDFTKDLELNLQKIFGKLFKRYIKKNISTEQDPTYSSSDELRESWWTNKKYIWTAMKHGAE MNGTTCGD-----GSVTG 745  
ALB01056.1 -----PQNKNAENKKKLCKALKYSFADYGDLIKGTSIWDNDFTKDLELNLQKIFGKLFKRYIKKNNTIVENTSYSSSDELRESWWTNKKYIWTAMKHGAE MNGTMCNAD-----GSVTG 747  
KNC35427.1 -----EKKNDNDGKKLCKALEYSFADYGDLIKGTSIWDNEYTKDLELNLQKAFGKLFKRYIKKNNTAEQDTSYSSSDELRESWWTNKKYIWTAMKHGAE MNGTTCSSGSGDNGDSSITGSSDSGSTT- 759  
ALB01046.1 -----HENKN--DNGKKLCKDLKYSFADYGDLIKGTSIWDNEYTKDLELNLQKIFGKLFKRYIKKNNTIVENTSYSSSDELRESWWTNKKYIWTAMKHGAE MNGTTCNAD-----GSVTG 741  
ALB01037.1 -----HEKKKGDNGKKLCKDLKYSFADYGDLIKGTSIWDNEYTKDLELNLQKIFGKLFKRYIKKNNTIVENTSYSSSDELRESWWTNKKYIWTAMKHGAE MNGTTCNAD-----GSVT- 746  
ALB01055.1 -----YLEKKKGDNNKSLCKDLKYSFADYGDLIKGTSIWDNDFTKDLELNLQKIFGKLFKRYIKKNNTAEQDPTYSSSDELRESWWTNKKYIWTAMKHGAE MNGTTCGD-----GSVTG 745  
AAQ73924.1 -----EKKNDNDGKKLCKALEYSFADYGDLIKGTSIWDNEYTKDLELNLQKIFGKLFKRYIKKNNTAEQDTSYSSSDELRESWWTNKKYIWTAMKHGAE MNGTTCSS-----GSVTG 733  
ALB01042.1 -----YPQKNDDNNKSLCKDLKYSFADYGDLIKGTSIWDNDFTKDLELNLQKIFGKLFKRYIKKNNTIVENTSYSSSDELRESWWTNKKYIWTAMKHGAE MNGTMCNAD-----GSVTG 744  
ADJ77410.1 -----EKKNAENKKKLCKALKYSFADYGDLIKGTSIWDNDFTKDLELNLQKIFGKLFKRYIKKNIASDENTLYSSSDELRESWWTNKKYIWTAMKHGAE MNGTTCSS-----GSVTG 742  
EWC75615.1 -----HQNNNSGKKKLCKALKYSFADYGDLIKGTSIWDNDFTKNLELNLQKIFGKLFKRYIKKNISTEQHTSYSSSDELRESWWTNKKYIWTAMKHGAE MNGTTCGD-----GSVTG 743  
ALB01054.1 KKNADNRKKNADNNKSLCKALKYSFADYGDLIKGTSIWDNEYTKDLELNLQNNFGKLFKRYIKKNNTAEQHTSYSSSDELRESWWTNKKYIWLAMKHGAE MNGTTCSS-----GSVT- 745  
ALB01057.1 -----LEKKKGDNGKKLCKALKYSFADYGDLIKGTSIWDNEYTKDLELNLQKIFGKLFKRYIKKNNTAEQHTSYSSSDELRESWWTNKKYIWLAMKHGAE MNGTMCNAD-----GSVT- 746  
ALB01040.1 -----PQNKNDNNKSLCKDLKYSFADYGDLIKGTSIWDNEYTKDLELNLQKAFGLFKGYIKKNNTAEQDTSYSSSDELRESWWTNKKYIWLAMKHGTTCSGTCNDNGD-----GSVT- 743  
ETW41644.1 -----QKKNDDNGKKLCKALEYSFADYGDLIKGTSIWDNEYTKDLELNLQKIFGKLFKRYIKKNNTIVENTSYSSSDELRESWWTNKKYIWTAMKHGAE MNGTTCSS--G-----GSVT- 737  
ALB01043.1 -----PQNKNDNNKSLCKDLKYSFADYGDLIKGTSIWDNEYTKDLELNLQKAFGLFKGYIKKNNTAEQDTSYSSSDELRESWWTNKKYIWLAMKHGTTCSGSGDNGD-----GSVT- 743  
EUT82883.1 -----LEKKNADNNKSLCKALEYSFADYGDLIKGTSIWDNEYTKDLELNLQNNFGKLFKRYIKKNIASDENTLYSSSDELRESWWTNKKYIWLAMKHGAE MNG--TTCSSG-----SGDN- 745  
ALB01038.1 -----PQNKNAENKKKLCKDLKYSFADYGDLIKGTSIWDNDFTKDLELNLQKAFGLFKRYIKKNISTEQHTLYSSSDELRESWWTNKKYIWTAMKHGAE MNIITCCGD-----GSVT- 714  
ALB01058.1 -----PQNKNAENKKKLCKDLKYSFADYGDLIKGTSIWDNDFTKDLELNLQKAFGLFKRYIKKNISTEQHTLYSSSDELRESWWTNKKYIWTAMKHGAE MNIITCCGD-----GSVT- 714  
ALB01059.1 -----PQNNNSGNKENLCKALKYSFADYGDLIKGTSIWDNDFTKDLELNLQKAFGLFKRYIKKNIASDENTSYSSSDELRESWWTNKKYIWLAMKHGAE MNGTTCG-----DGSVT- 733  
KNG76633.1 -----Q--NNNSGNKENLCKALKYSFADYGDLIKGTSIWDNDFTKDLELNLQKIFGKLFKRYIKKNIASDENTSYSSSDELRESWWTNKKYIWLAMKHGAE MNGTTCSS-----GSVT- 728  
ALB01051.1 -----PQKKNADNGKKLCKALKYSFADYGDLIKGTSIWDNDFTKDLELNLQKIFGKLFKRYIKKNISTEQHTLYSSSDELRESWWTNKKYIWTAMKHGAE MNGTTCSS-----GSVT- 730  
ALB01049.1 -----PQNKNDNNKSLCKALEYSFADYGDLIKGTSIWDNEYTKDLELNLQKAFGLFKRYIKKNNTAEQHTSYSSSDELRESWWTNKKYIWTAMKHGAE MNGTTCSS-----GSVT- 730  
EWC75604.1 -----PQNNNSGNKENLCKALEYSFADYGDLIKGTSIWDNDFTKNVELNLQKIFGKLFKRYIKKNISTEQDPTYSSSDELRESWWTNKKYIWTAMKHGAE MNGTTCSS-----GSVT- 726  
ALB01045.1 -----E--NKNDDNGKKLCKDLKYSFADYGDLIKGTSIWDNEYTKDLELNLQKAFGLFKRYIKKNNTAEQDTSYSSSDELRESWWTNKKYIWLAMKHGAE MNGTTCGGDGS-----VTGSSDSGSTT- 742  
ALB01047.1 -----P-----QNKKKLCKDLKYSFADYGDLIKGTSIWDNEYTKDLELNLQKAFGLFKRYIKKNISTEQHTLYSSSDELRESWWTNKKYIWTAMKHGAE MNGTMCN-----ADGSVT- 734  
7G8.pro -----HEKKNDDNGKKLCKALEYSFADYGDLIKGTSIWDNEYTKDLELNLQKAFGLFKRYIKKNISTAEQDTSYSSSDELRESWWTNKKYIWTAMKHGAE MNGTTCGGD-----SSGE- 747  
124\_8.pro -----KKNDDNGKKLCKDLKYSFADYGDLIKGTSIWDNEYTKDLELNLQKIFGKLFKRYIKKNIASDENTLYSSSDELRESWWTNKKYIWLAMKHGTTCSGSGDNGD-----GSVT- 745  
indo.pro -----PEKKKGDNGKKLCKDLKYSFADYGDLIKGTSIWDNEYTKDLELNLQKIFGKLFKRYIKKNIASDENTLYSSSDELRESWWTNKKYIWLAMKHGAE MNGTMCNAD-----GSVT- 744  
KMWII.pro -----EKKKGDNGKKLCKALEYSFADYGDLIKGTSIWDNEYTKDLELNLQKAFGLFKRYIKKNIASDENTSYSSSDELRESWWTNKKYIWTAMKHGAE MNS--TMCNAD-----GSVT- 742  
M24.pro -----PQNKNDNNKSLCKALEYSFADYGDLIKGTSIWDNEYTKDLELNLQKIFGKLFKRYIKKNISTEQDPTYSSSDELRESWWTNKKYIWLAMKHGAE MNIITC--CGD-----GSVT- 745  
M51.pro -----LEKKNDNDGKKLCKALEYSFADYGDLIKGTSIWDNEYTKDLELNLQKAFGLFKRYIKKNNTAEQDTSYSSSDELRESWWTNKKYIWTAMKHGAE MNGTTCSS-----GSGD- 748  
P13.pro -----HQNNNSGKKKLCKALKYSFADYGDLIKGTSIWDNDFTKDLELNLQKIFGKLFKRYIKKNIASDENTSYSSSDELRESWWTNKKYIWLAMKHGAE MNGTMCNAD-----GSVTG 742  
T2C6.pro -----PQKKNDDNGKKLCKDLKYSFADYGDLIKGTSIWDNEYTKNVELNLQNNFGKLFKRYIKKNNTAEQDTSYSSSDELRESWWTNKKYIWLAMKHGAE MNGTTCGGD-----GSVT- 747  
V1\_S.pro -----EKKNDNDGKKLCKALEYSFADYGDLIKGTSIWDNEYTKDLELNLQKAFGLFKRYIKKNNTAEQDTSYSSSDELRESWWTNKKYIWLAMKHGAE MNGTTCSS-----GSVT- 737  
WR80.pro -----EKK--GENKRLCKALEYSFADYGDLIKGTSIWDNEYTKDLELNLQNNFGKLFKRYIKKNISTEQHTSYSSSDELRESWWTNKKYIWTAMKHGAE MNGTTCSSG-----SGDNGDSSIT- 740  
PFL0030cexon1+2.pro -----HEKKNDDNGKKLCKALEYSFADYGDLIKGTSIWDNEYTKDLELNLQKIFGKLFKRYIKKNNTAEQDTSYSSSDELRESWWTNKKYIWLAMKHGAE MNGTTCGGD-----GSVT- 740  
A4PFL0030c exon1+2.pro -----PQNKNSGNKENLCKALEYSFADYGDLIKGTSIWDNEYTKDLELNLQNNFGKLFKRYIKKNNTAEQDTSYSSSDELRESWWTNKKYIWTAMKHGAE MNIITC--NAD-----GSVT- 742  
Newdd2var2CSAsequence.pro -----EKKNDNDGKKLCKALEYSFADYGDLIKGTSIWDNEYTKDLELNLQKIFGKLFKRYIKKNNTAEQHTSYSSSDELRESWWTNKKYIWTAMKHGAE MNGTTCSS-----GSVT- 733  
McPFL0030c.pro KKNDDNGKKNDNNKSLCKDLKYSFADYGDLIKGTSIWDNEYTKDLELNLQKIFGKLFKRYIKKNIASDENTLYSSSDELRESWWTNKKYIWLAMKHGAE MNGTTCNAD-----GSVT- 751  
HB3-1var2CSA.pro -----EKKNDNDGKKLCKALEYSFADYGDLIKGTSIWDNDFTKDLELNLQKIFGKLFKRYIKKNNTAEQDTSYSSSDELRESWWTNKKYIWTAMKHGAE MNS--TTCSSGD-----GSVT- 742  
HB3-2var2CSA.pro -----PQ---NKKLCKDLKYSFADYGDLIKGTSIWDNEYTKDLELNLQKAFGLFKRYIKKNISTEQHTLYSSSDELRESWWTNKKYIWLAMKHGAE MNS--TTCSSGD-----GSVT- 742

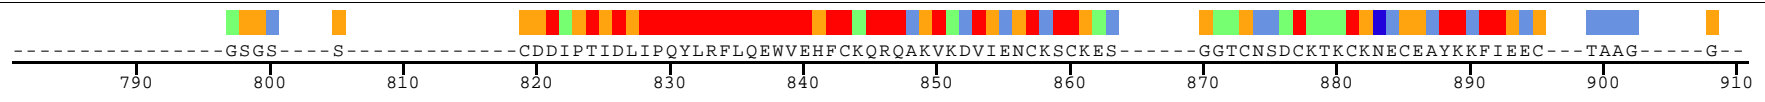

|                           |                                                                                                                             |     |
|---------------------------|-----------------------------------------------------------------------------------------------------------------------------|-----|
| ALB01044.1                | -----GSGS---S-----CDDIPTIDLIPQYLRFLQEWVEHFCKQRQEKVKPVIENCKSKCKES-----GGTCNGECKTECKNKCEVYKFFIEECG---TAA---GG--               | 823 |
| ALB01053.1                | -----GSGS---S-----CDDIPTIDLIPQYLRFLQEWVEHFCKQRQEKVKPVIENCKSKCKES-----GGTCNGECKTECKNKCEVYKFFIEELW---TAA---GG--               | 823 |
| ETW56275.1                | -----GSGS---S-----CDDIPTIDLIPQYLRFLQEWVEHFCKQRQAKVKDVIENCKSKCKES-----GNCKCKTECKNKCEAYKFFIENCK---GG---DG--                   | 828 |
| ALB01048.1                | -----GSGS---S-----CDDIPTIDLIPQYLRFLQEWVEHFCKQRQEKVKPVIENCKSKCKNTSSKTKLGGTCNGECKTECKNKCEAYKFFIEEFR---TAA---GG--              | 831 |
| ALB01041.1                | SSDSGS-----TTCSGDNGSIS-----CDDIPTIDLIPQYLRFLQEWVEHFCKQRQENVNAVIENCKSKCKES-----GGTCNSDCEKKCKIECEKYKNFIEECNG-TAAG---G--       | 841 |
| ALB01039.1                | SSDSGS-----TTCSGDNGSIS-----CDDIPTIDLIPQYLRFLQEWVEHFCKQRQENVNAVIENCKSKCKES-----GGTCNSDCEKKCKIECEKYKNFIEECNG-TAAG---G--       | 841 |
| ALB01056.1                | SSDSGS-----TTCSGDNGSIS-----CDDMPTIDLIPQYLRFLQEWVEHFCKQRQEKVNAVITNCKSKCKES-----GGTCGSDCKTKCKGCEAYKFFIEKCN-TAAE---G--         | 843 |
| KNC35427.1                | -----CSGDNGSIS-----CDDIPTTDFIPQYLRFLQEWVEHFCEQRQAKVKDVIENCKSKCKES-----GGTCNGECKTKCKDECEKYKFFIEDCN---GG---DG--               | 844 |
| ALB01046.1                | SSDSGSTTCCGDGSVTGSGS---S-----CDDIPTIDLIPQYLRFLQEWVEHFCEQRQAKVKDVIENCKSKCKNTSGERKIGDTCGSDCKTKCKNKCDAYKFFIDGTG---GGGSRPTG--   | 850 |
| ALB01037.1                | -----GSGS---S-----CDDIPTIDLIPQYLRFLQEWVEHFCEQRQAKVNAVITNCKSKCKES-----GGTCGSDCKTKCKDECEKYKFFIEECR---TAA---G--                | 828 |
| ALB01055.1                | SSDSGSTTCCSGD---N-GS-I---S-----CDDIPTIDLIPQYLRFLQEWVEHFCKQRQAKVKDVIENCKSKCKES-----GGTCNSDCKTKCKGCEYKFFIEHCK---GVGG---TG--   | 841 |
| AAQ73924.1                | -----CSGD---S-----SNDMPTIDLIPQYLRFLQEWVEHFCKQRQEKVNAVIENCKSKCKES-----GGTCNSDCKTECKNKCEAYKFFIEDCK---GGV---TG--               | 815 |
| ALB01042.1                | SSDSGSTTCCSGD---NGSGS---S-----CDDIPTIDLIPQYLRFLQEWVEHFCKQRQEKVNAVITNCKSKCKES-----GGTCNSDCKTECKNKCEAYKFFIEDCK---GGG---TG--   | 840 |
| AJD77410.1                | -----GSGD---S-----SNDIPTIDLIPQYLRFLQEWVEHFCEQRQAKVKPVIENCKSKCKNTSSKTKIGDTCGNDCKTECKNKCEYKFFIEECR---TAA---EG--               | 830 |
| EWC75615.1                | SSDSGSTTCCGDGSVTGSGS---S-----CDDIPTIDLIPQYLRFLQEWVEHFCEQRQAKVKDVIENCKSKCKECGG---TCNGECKTECKNKCEAYKFFIEECN---GGG---GEG       | 846 |
| ALB01054.1                | -----GSGD---S-----SNDIPTTDFIPQYLRFLQEWVEHFCKQRQEKVNAVIENCKSKCKES-----GNKCKTECEKKCEAYKFFIEECN---GGAA---EG--                  | 824 |
| ALB01057.1                | -----GSGS---S-----CDDIPTIDLIPQYLRFLQEWVEHFCEQRQGVKVKHVMESCKSKCKNTSGERKIGGTCNGDCKTECKNKCDAYKFFIEECR---TAAE---G--             | 834 |
| ALB01040.1                | -----GSSD---SGSTTCSGDNGSIS-----CDDMPTIDLIPQYLRFLQEWVEHFCKQRQAKVKDVIENCKSKCKNTSGERIIIGTCGSDCKTKCKVACDAYKFFIEKC---GTAAD---G-- | 844 |
| ETW41644.1                | -----DNGD---S-----SNDIPTTDFIPQYLRFLQEWVEHFCEQRQGVKVKHVMESCKSKCKNTSSKTKLGGKCGNDCEKKCKDECEKYKFFIEECV---TAA---GG--             | 825 |
| ALB01043.1                | -----GSSD---SGSTTCSGDNGSIS-----CDDMPTIDLIPQYLRFLQEWVEHFCKQRQAKVKDVIENCKSKCKNTSGERIIIGTCGSDCKTKCKVACDAYKFFIEKC---GTAAD---G-- | 844 |
| EUT82883.1                | -----GS-I---S-----CDDIPTIDLIPQYLRFLQEWVEHFCKQRQAKVKDVIENCKSKCKES-----GNKCKTECKNKCEAYKFFIEEF---CTAAG---G--                   | 822 |
| ALB01038.1                | -----GSGS---S-----CDDMPTTDFIPQYLRFLQEWVEHFCKQRQAKVNAVIENCKSKCKNTSSKTKLGGKCGSDCEKKCKVACDAYKFFIEECG---TAVG---G--              | 802 |
| ALB01058.1                | -----GSGS---S-----CDDMPTTDFIPQYLRFLQEWVEHFCKQRQAKVNAVIENCKSKCKNTSSKTKLGGKCGSDCEKKCKVACDAYKFFIEECG---TAGG---G--              | 802 |
| ALB01059.1                | -----GSGS---S-----CDDIPTIDLIPQYLRFLQEWVEHFCEQRQEKVKHVMESCKSKCKE---GGTCGSDCEKKCK---AYKEFIEKCKG-QAAE---G--                    | 812 |
| KNG76633.1                | -----CSGD---S-----SDDIPTIDLIPQYLRFLQEWVEHFCKQRQAKVNAVITNCKSKCKES-----GNKCKTECKTECKNKCEVYKFFIEKCG---TAA---G--                | 810 |
| ALB01051.1                | -----CSGD---SSS---GENQNTNSCDDIPTIDLIPQYLRFLQEWVEHFCEQRQGVKVKDVIENCKSKCKE---TCNGECKTECKTKCKGCEYKFFIEECG-KAAE---G--           | 826 |
| ALB01049.1                | -----CSGD---S-----SNDIPTTDFIPQYLRFLQEWVEHFCEQRQAKVKDVIENCKSKCKES-----GGTCGSDCEKKCKDECEKYKFFIEEFC---TAA---G--                | 812 |
| EWC75604.1                | -----CSGS---S-----CDDIPTIDLIPQYLRFLQEWVEHFCKQRQEKVNAVITNCKSKCKNTSSKTKIGDTCNSDCEKKCKDECEKYKFFIEEAG---TAVG---G--              | 814 |
| ALB01045.1                | -----CCGD---GSV---TGSGSSCDDIPTIDLIPQYLRFLQEWVEHFCEQRQAKVKDVIENCKSKCKNTSGERKIGDTCGNDCEKKCKVACDAYKFFIEECR---TAAE---G--        | 838 |
| ALB01047.1                | -----GSGS---S-----CDDIPTIDLIPQYLRFLQEWVEHFCKQRQEKVNAVINCKSKCKNTSSKTKLGGKCGSDCEKKCKIECEKYKFFIEEYV---TAVG---G--               | 822 |
| 7G8.pro                   | -----NQTN---S-----CDDIPTIDLIPQYLRFLQEWVEHFCEQRQAKVKDVIENCKSKCKNTSGERKIGGTCNGECKTECKNKCEAYKFFIEHC---KGGD---G--               | 834 |
| 124_8.pro                 | -----GSGS---S-----CDDMSTIDLIPQYLRFLQEWVEHFCKQRQEKVKDVIENCKSKCKNTSGERIIIGTCGSDCKTKCKGECDAYKNFIEE---CKRGD---G--               | 832 |
| indo.pro                  | -----GSGS---S-----CDDMPTIDLIPQYLRFLQEWVEHFCKQRQEKVKPVIENCKSKCKNTSSERKIGGTCNSDCKTECKNKCEVYKFFIEDCK---GGDG---G--              | 830 |
| KMWII.pro                 | -----GSGS---S-----CDDIPTTDFIPQYLRFLQEWVEHFCKQRQEKVNAVIENCKSKCKNTSGERKIGGTCNGECKTECKNKCEAYKFFIED---CKGGD---G--               | 829 |
| M24.pro                   | -----GSGS---S-----CDDIPTIDLIPQYLRFLQEWVEHFCKQRQEKVKDVIENCKSKCKNTSSKTKLGGTCNSDCEKKCKIECEKYKFFIEEC---RTAVG---G--              | 833 |
| MTS1.pro                  | -----S-----SNDIPTTDFIPQYLRFLQEWVEHFCEQRQAKVKDVIENCKSKCKNTSGERKIGDTCNSDCEKKCKDECEKYKFFIEDCN---KGGD---G--                     | 831 |
| P13.pro                   | SSDSGS-----TTCSGDNGSIS-----CDDIPTIDLIPQYLRFLQEWVEHFCKQRQEKVKDVIENCKSKCKES-----GDTCSNDCCEKKCKNKCEAYKFFIEERR---TAAQ---G--     | 837 |
| T2C6.pro                  | -----GSGS---S-----CDDIPTIDLIPQYLRFLQEWVEHFCKQRQAKVKDVIENCKSKCKES-----GNKCKTECKNKCKDECEKYKFFIEACG---TAV---GGTG               | 830 |
| V1_S.pro                  | -----CSGD---S-----SNDMPTIDLIPQYLRFLQEWVEHFCEQRQAKVKDVIENCKSKCKES-----GNKCKTECKTKCKDECEKYKFFIEDCN---GGG---TG--               | 819 |
| WR80.pro                  | -----GSSD---SGSTTCSGDNGSIS-----CDDIPTIDLIPQYLRFLQEWVEHFCKQRQAKVNAVITNCKSKCKES-----GDTCSNDCCEKKCKIECEKYKFFIEECG---TAA---G--  | 835 |
| PFL0030cexon1+2.pro       | -----GSGS---S-----CDDIPTIDLIPQYLRFLQEWVEHFCKQRQEKVKPVIENCKSKCKES-----GGTCNGECKTECKNKCEVYKFFIEDCK---GGD---G--                | 821 |
| A4PFL0030c exon1+2.pro    | -----GSGS---S-----CDDIPTIDLIPQYLRFLQEWVEHFCEQRQAKVKDVIENCKSKCKES-----GNKCKTECKTKCKDECEKYKFFIEAC---GTAGG---IG--              | 826 |
| Newdd2var2CSAsequence.pro | -----CSGD---S-----SNDMPTIDLIPQYLRFLQEWVEHFCKQRQEKVNAVIENCKSKCKES-----GGTCNSDCKTECKNKCEAYKFFIEDCK---GGG---TG--               | 815 |
| McPFL0030c.pro            | -----GSGS---S-----CDDIPTIDLIPQYLRFLQEWVEHFCKQRQAKVKDVIENCKSKCKES-----GNKCKTECKNKCEAYKFFIENCK---GG---DG--                    | 828 |
| HB3-1var2CSA.pro          | -----GSGS---S-----CDDMPTIDLIPQYLRFLQEWVEHFCKQRQEKVKDVIENCKSKCKE---DTCNGECKTECKTKCKGCEYKFFIEEC---NGTADG---G--                | 829 |
| HB3-2var2CSA.pro          | -----GSGS---S-----CDDIPTIDLIPQYLRFLQEWVEHFCKQRQEKVNAVIENCKSKCKE---DTCNGECKTECKCKIECEKYKFFIEEC---VTAVG---G--                 | 828 |

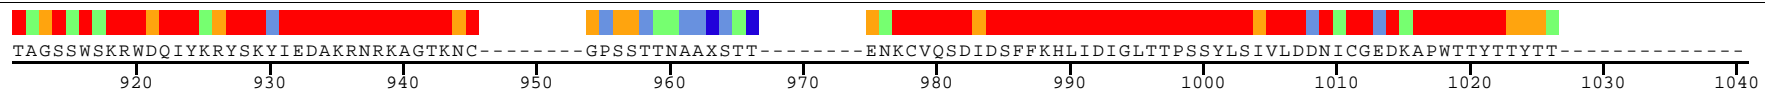

|                           |                                                                                                                                   |     |
|---------------------------|-----------------------------------------------------------------------------------------------------------------------------------|-----|
| ALB01044.1                | TAGSPWSKRWDQIYKRYSKHIEDAKRNRKAGTKNC-----GPSSTTNAAEN-----KCVQSDIDSFFKHLIDIGLTTTPSSYLSIVLDDNICGADKAPWTTYTTYTTT-----                 | 920 |
| ALB01053.1                | TAGSPWSKRWDQIYKRYSKHIEDAKRNRKAGTKNC-----GPSSTTNAAEN-----KCVQSDIDSFFKHLIDIGLTTTPSSYLSIVLDDNICGADKAPWTTYTTYTTT-----                 | 920 |
| ETW56275.1                | TAGSSWVKRWDQIYMRYSKYIEDAKRNRKAGTKNC-----GPSSIITNVSASTD-----ENKCVQSDIDSFFKHLIDIGLTTTPSSYLSIVLDDNICGDDKAPWTTYTTYTTYTT-----          | 936 |
| ALB01048.1                | TAGSPWSKRWDQIYKMYSKHIEDAKRNRKAGTKNC-----GITGTISGESSGATSGVTTTESKCVQSDIDSFFKHLIDIGLTTTPSSYLSIVLDDNICGEDNAPWTTYTTYTTK-----           | 940 |
| ALB01041.1                | TSGSSWSKRWDQIYKRYSKYIEDAKRNRKAGTKNCGITTTGTISGESSGATSGVTTT-----ENKCVQSDIDSFFKHLIDIGLTTTPSSYLSIVLDDNICGEDKAPWTTYTTYTT-----          | 949 |
| ALB01039.1                | TSGSSWSKRWDQIYKRYSKYIEDAKRNRKAGTKNCGITTTGTISGESSGATSGVTTT-----ENKCVQSDIDSFFKHLIDIGLTTTPSSYLSIVLDDNICGEDKAPWTTYTTYTT-----          | 949 |
| ALB01056.1                | TSGSPWSKRWDQIYMRYSKYIEDAKRNRKAGTKNC-----GTSSGATSGVTTT-----ENKCVQSDIDSFFKHLIDIGLTTTPSSYLSIVLDDNICGADKAPWTTYTTYTT-----              | 943 |
| KNC35427.1                | TAGSSWVKRWDQIYKRYSKHIEDAKRNRKAGTKNC-----GPSSIITNAAASTD-----ENKCVQSDIDSFFKHLIDIGLTTTPSSYLSIVLDDNICGDDKAPWTTYTTYTT-----             | 943 |
| ALB01046.1                | TAGSSWSKRWDQIYMRYSKYIEDAKRNRKAGTKSCGITTTGTISGESSGANGSVTTT-----ESKCVQSDIDSFFKHLIDIGLTTTPSSYLSIVLDDNICGEDKAPWTTYTTYTT-----          | 959 |
| ALB01037.1                | TAGSSWSKRWDQIYKMYSKHIEDAKRNRKAGTKNCGITTTGTISGESSGANGSVTTT-----ENKCVQSDIDSFFKHLIDIGLTTTPSSYLSIVLDDNICGEDKAPWTTYTTYTT-----          | 935 |
| ALB01055.1                | TAGSSWVKRWDQIYMRYSKYIEDAKRNRKAGTKSC-----GTSSGANGSVTTT-----ESKCVQSDIDSFFKHLIDIGLTTTPSSYLSIVLDDNICGDDKAPWTTYTTYTT-----              | 941 |
| AAQ73924.1                | TAGSPWSKRWDQIYKRYSKHIEDAKRNRKAGTKNC-----GTSSTTNAASTD-----ENKCVQSDIDSFFKHLIDIGLTTTPSSYLSIVLDDNICGADKAPWTTYTTYTT-----               | 914 |
| ALB01042.1                | TAGSSWVKRWDQIYMRYSKYIEDAKRNRKAGTKSC-----GTSSGANGSVTTT-----ENKCVQSDIDSFFKHLIDIGLTTTPSSYLSIVLDDNICGADKAPWTTYTTYTTYTTYTT-----        | 946 |
| AJD77410.1                | TAGSSWVKRWDQIYKRYSKYIEDAKRNRKAGTKNC-----GPSSTTNAAEN-----KCVQSDIDSFFKHLIDIGLTTTPSSYLSIVLDDNICGEDNAPWTTYTTYTT-----                  | 925 |
| EWC7615.1                 | TSGSSWSKRWDQIYMRYSKYIEDAKRNRKAGTKNC-----GTSSTTNAAEN-----KCVQSDIDSFFKHLIDIGLTTTPSSYLSIVLDDNICGEDKAPWTTYTTYTT-----                  | 942 |
| ALB01054.1                | TSGSSWSKRWDQIYMRYSKYIEDAKRNRKAGTKNC-----GPSSGANGSVTTT-----ENKCVQSDIDSFFKHLIDIGLTTTPSSYLSIVLDDNICGADNAPWTTYTTYTT-----              | 923 |
| ALB01057.1                | TAESSWSKRWDQIYKRYSKYIEDAKRNRKAGTKNCGITTTGTISGESSGANGSVTTT-----ENKCVQSDIDSFFKHLIDIGLTTTPSSYLSIVLDDNICGEDNAPWTTYTTYTT-----          | 941 |
| ALB01040.1                | TAGSSWSKRWDQIYKMYSKHIEDAKRNRKAGTKNC-----GPSSTTNVSVSTD-----ENKCVQSDIDSFFKHLIDIGLTTTPSSYLSIVLDDNICGEDKAPWTTYTTYTT-----              | 943 |
| ETW41644.1                | TAGSPWSKRWDQIYKRYSKYIEDAKRNRKAGTKNC-----GTSSTTNAASTA-----ESKCVQSDIDSFFKHLIDIGLTTTPSSYLSIVLDDNICGEDKAPWTTYTTYTTYTTYTT-----         | 930 |
| ALB01043.1                | TAGSSWSKRWDQIYKMYSKHIEDAKRNRKAGTKNC-----GPSSTTNVSVSTD-----ENKCVQSDIDSFFKHLIDIGLTTTPSSYLSIVLDDNICGEDKAPWTTYTTYTT-----              | 943 |
| EUT82883.1                | TSGSPWSKRWDQIYKMYSKYIEDAKRNRKAGTKNC-----GTSSTTST---A-----ESKCVQSDIDSFFKHLIDIGLTTTPSSYLSIVLDDNICGDDKAPWTTYTTYTT-----               | 918 |
| ALB01038.1                | TAGSSWVKRWDQIYKRYSKHIEDAKRNRKAGTKNCGTSSSTTN-----AAASTA-----ENKCVQSDIDSFFKHLIDIGLTTTPSSYLSIVLDDNICGEDKAPWTTYTTYTT-----             | 901 |
| ALB01058.1                | TAGSSWVKRWDQIYKRYSKHIEDAKRNRKAGTKNCGTSSSTTN-----AAASTA-----ENKCVQSDIDSFFKHLIDIGLTTTPSSYLSIVLDDNICGEDKAPWTTYTTYTT-----             | 901 |
| ALB01059.1                | TSGSSWSKRWDQIYKRYSKYIEDAKRNRKAGTKNC-----GPSSTTNAASTT-----ENKCVQSDIDSFFKHLIDIGLTTTPSSYLSIVLDDNICGADKAPWTTYTTYTT-----               | 912 |
| KNG76633.1                | TAGSSWSKRWDQIYKRYSKHIEDAKRNRKAGTKNC-----GTSSTTN---AA-----ESKCVQSDIDSFFKHLIDIGLTTTPSSYLSIVLDDNICGDDKAPWTTYTTYTT-----               | 906 |
| ALB01051.1                | TSGSSWVKRWDQIYKRYSKYIEDAKRNRKAGTKSC-----GTSSTTN---AA-----ENKCVQSDIDSFFKHLIDIGLTTTPSSYLSIVLDDNICGADNAPWTTYTTYTT-----               | 922 |
| ALB01049.1                | TSGSPWSKRWDQIYKRYSKDIEDAKRNRKAGTKNC-----GTS-----TA-----ENKCVQSDIDSFFKHLIDIGLTTTPSSYLSIVLDDNICGDDKAPWTTYTTYTT-----                 | 905 |
| EWC75604.1                | TAGSPWSKRWDQIYKRYSKHIEDAKRNRKAGTKNC-----GPSSTTNAASTD-----ENKCVQSDIDSFFKHLIDIGLTTTPSSYLSIVLDDNICGDDKAPWTTYTTYTT-----               | 915 |
| ALB01045.1                | TAGSSWVKRWDQIYKRYSKYIEDAKRNRKAGTKNC-----GPSSTTN---AA-----ESKCVQSDIDSFFKHLIDIGLTTTPSSYLSIVLDDNICGEDNAPWTTYTTYTT-----               | 935 |
| ALB01047.1                | TSGSPWSKRWDQIYKRYSKYIEDAKRNRKAGTKSC-----GTSSTTNAASTA-----ESKCVQSDIDSFFKHLIDIGLTTTPSSYLSIVLDDNICGADNAPWTTYTTYTT-----               | 923 |
| 7G8.pro                   | TAGSSWVKRWDQIYKRYSKHIEDAKRNRKAGTKNCGTSSST---A-----ENKCVQSDIDSFFKHLIDIGLTTTPSSYLSIVLDDNICGEDKAPWTTYTT-----                         | 922 |
| 124_8.pro                 | TAGSPWSKRWDQIYMRYSKYIEDAKRNRKAGTKNC-----GTSSTTNA---A-----ENKCVQSDIDSFFKHLIDIGLTTTPSSYLSIVLDDNICGDDKAPWTTYTTYTT-----               | 928 |
| indo.pro                  | TAGSSWSKRWDQIYKRYSKYIEDAKRNRKAGTKNC-----GPSSTTNAAEN-----KCVQSDIDSFFKHLIDIGLTTTPSSYLSIVLDDNICGEDNAPWTTYTTYTT-----                  | 928 |
| KMWII.pro                 | TAGSSWVKRWDQIYKRYSKHIEDAKRNRKAGTKSC-----GPSSIITNVSVD-----ENKCVQSDIDSFFKHLIDIGLTTTPSSYLSIVLDDNICGEDNAPWTTYTTYTT-----               | 929 |
| M24.pro                   | TAGSSWSKRWDQIYKMYSKHIEDAKRNRKAGTKNCGITTTGTISGESSGANGSVTTT-----ENKCVQSDIDSFFKHLIDIGLTTTPSSYLSIVLDDNICGDDKAPWTTYTTYTTYTT-----       | 943 |
| MTS1.pro                  | TAGSSWVKRWDQIYKRYSKHIEDAKRNRKAGTKNCGITTTGTISGESSGATSGVTTT-----ENKCVQSDIDSFFKHLIDIGLTTTPSSYLSIVLDDNICGEDNAPWTTYTTYTT-----          | 937 |
| p13.pro                   | TAESSWVKRWDQIYMRYSKYIEDAKRNRKAGTKSC-----GPSSTTNAASTA-----ENKCVQSDIDSFFKHLIDIGLTTTPSSYLSIVLDDNICGADNAPWTTYTTYTT-----               | 938 |
| T2C6.pro                  | TAGSPWSKRWDQIYKRYSKHIEDAKRNRKAGTKNC-----GPSSTTNAAEN-----KCVQSDIDSFFKHLIDIGLTTTPSSYLSIVLDDNICGADKAPWTTYTTYTT-----                  | 927 |
| V1_S.pro                  | TAGSSWVKRWDQIYKRYSKHIEDAKRNRKAGTKNC-----GPSSTTNAASTD-----ENKCVQSDIDSFFKHLIDIGLTTTPSSYLSIVLDDNICGDDKAPWTTYTTYTT-----               | 918 |
| WR80.pro                  | TAGSPWSKRWDQIYKRYSKYIEDAKRNRKAGTKNC-----GPSSTT---STA-----ESKCVQSDIDSFFKHLIDIGLTTTPSSYLSIVLDDNICGADKAPWTTYTTYTT-----               | 932 |
| PFL0030cexon1+2.pro       | TAGSSWVKRWDQIYKRYSKYIEDAKRNRKAGTKNC-----GPSSTTNAAEN-----KCVQSDIDSFFKHLIDIGLTTTPSSYLSIVLDDNICGADKAPWTTYTTYTT-----                  | 918 |
| A4PFL0030c exon1+2.pro    | TAGSPWSKRWDQIYKRYSKHIEDAKRNRKAGTKNC-----GTSSTTNAASTD-----ENKCVQSDIDSFFKHLIDIGLTTTPSSYLSIVLDDNICGADKAPWTTYTTYTT-----               | 926 |
| Newdd2var2CSAsequence.pro | TAGSPWSKRWDQIYKRYSKHIEDAKRNRKAGTKNC-----GTSSTTNAASTD-----ENKCVQSDIDSFFKHLIDIGLTTTPSSYLSIVLDDNICGADKAPWTTYTTYTT-----               | 914 |
| McPFL0030c.pro            | TAGSSWVKRWDQIYMRYSKYIEDAKRNRKAGTKNC-----GPSSIITNVSASTD-----ENKCVQSDIDSFFKHLIDIGLTTTPSSYLSIVLDDNICGDDKAPWTTYTTYTTYTTYTTYTTYTT----- | 941 |
| HB3-1var2CSA.pro          | TSGSSWSKRWDQIYKRYSKYIEDAKRNRKAGTKNC-----GTSSTTNAASTT-----ENKCVQSDIDSFFKHLIDIGLTTTPSSYLSIVLDDNICGEDKAPWTTYTTYTT-----               | 928 |
| HB3-2var2CSA.pro          | TSGSPWSKRWDQIYKRYSKYIEDAKRNRKAGTKNCGITTTGTISGESSGANGSVTTT-----ENKCVQSDIDSFFKHLIDIGLTTTPSSYLSIVLDDNICGADNAPWTTYTTYTTYTT-----       | 938 |



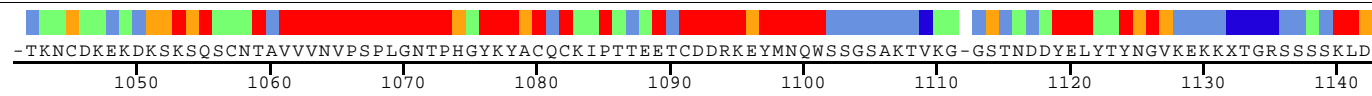

|                           |                                                                                                            |      |
|---------------------------|------------------------------------------------------------------------------------------------------------|------|
| ALB01044.1                | --EKC�KETDKSKSQSCNTAVVVVNVPSPLGNTPHGYKYACQCKIPTNEETCDDRKEYMNQWSSGSARTMVKR-GYKNDNYELCKYNGVDVKPTTVRSNSSKLD   | 1018 |
| ALB01053.1                | --EKC�KETDKSKSQSCNTAVVVVNVPSPLGNTPHGYKYACQCKIPTNEETCDDRKEYMNQWSSGSARTMVKR-GYKNDNYELCKYNGVDVKPTTVRSNSSKLD   | 1018 |
| ETW56275.1                | TTKNC DKERDKSKSQSCNTAVVVVNVPSPLGNTPHGYKYACECKTPSNKELCDDRKEYMNQWSSSGSAQTVRD-RSGKDYELTYNGVKETKLPKKLNSKLD     | 1036 |
| ALB01048.1                | --N-CDKEKDKSKSQSCNTAVVVVNVPSPLGNTPHGYKYACQCKIPTTEESCDDRKEYMNQWI IDNTKNPKGSGSTNNDYELTYNGVQIKQAAGRSSSTKLD    | 1038 |
| ALB01041.1                | --KNC DK EKDKSKSQSCNTAVVVVNVPSPLGNTPHGYKYACECKIPTTEETCDDRKEYMNQWSSSGSAQTVRD-RSGKDYELTYNGVKETKLPKKSSTKLD    | 1047 |
| ALB01039.1                | --KNC DK EKDKSKSQSCNTAVVVVNVPSPLGNTPHGYKYACECKIPTTEETCDDRKEYMNQWSSSGSAQTVRD-RSGKDYELTYNGVKETKLPKKSSTKLD    | 1047 |
| ALB01056.1                | --KNC DIQKDKSKLQCCNTAVVVVNVPSPLGNTPHGYKYACQCRTPSNKESDDRKEYMNQWSSCGSAQTVRG-RSTNNDYELTYNGVKETKPLGTLKNSKLN    | 1041 |
| KNC35427.1                | TTEKCNKERDKSKSQSSDILVVVVNVPSPLGNTPHGYKYACECKIPTTEETCDDRKEYMNQWISDTSKKQKGS GSKDYELTYNGVQIKQAAGRSSSTKLD      | 1044 |
| ALB01046.1                | --KNC DKDKKSKSQPINISVVVVNVPSPLGNTPHGYKYACECKIPTTEETCDDRKEYMNQWSRGSAGTVRG-RSTNNDYELTYNGVQIKQAAGTLNSPKLD     | 1057 |
| ALB01037.1                | TTKNC DK EKDKSKSQSCNTAVVVVNVPSPLGNTPHGYKYACQCKIPTNEETCDDRKEYMNQWSSSGSAQTVRG-RSTNNDYELTYNGVQIKPTTVRSSTKLD   | 1035 |
| ALB01055.1                | --KNC DKDKKTPK PQSSNTAVVVVNVPSPLGNTPHGYKYACQCKIPTTEETCDDRKEYMNQWSSSGSAQTVRG-RSTNNDYELTYNGVQIKQAAGTLNSKLD   | 1039 |
| AAQ73924.1                | TTKNC DIQKDKTPK SQSCDILVVVVNVPSPLGNTPHGYKYACECKIPTTEETCDDRKEYMNQWSSCGSAQTVRG-RSGKDYELTYNGVKETKPLGTLKNSKLD  | 1014 |
| ALB01042.1                | -TKNC DKDKKSKSQSCDILVVVVNVPSPLGNTPHGYKYACECKIPTNEETCDDRKEYMNQWISDTSKNPKGGRSTNNDYELTYNGVKETKPLGTLKNSKLN     | 1046 |
| AJD77410.1                | TTKNC DKDKKSKSQSCDILVVVVNVPSPLGNTPHGYKYACECKTPSNKQESDDRKEYMNQWISDNTKNPKGSGSKDYELTYNGVDVKPTTVRSSTKLD        | 1026 |
| EWG75615.1                | -TEKCNKETDKSKSQSCDILVVVVNVPSPLGNTPHGYKYACQCRTPSNKELCDDRKEYMNQWISDNTKNPKGSGSKDYELTYNGVQIKQAAGRSSSTKLD       | 1042 |
| ALB01054.1                | -TEKCNKETDKSKPQSCNTAVVVVNVPSPLGNTPHGYKYACQCRTPSNKELCDDRKEYMNQWSSSGSAQTVRD-RSGKDYELCKYNGVKETKLPKKSSTKLD     | 1022 |
| ALB01057.1                | TTKNC DIQKDKKSKSQSCNTAVVVVNVPSPLGNTPHGYKYACECKIPTTEESCDDRKEYMNQWSSCGSAQTVRG-RSTNNDYELTYNGVKETKPLGTLKNSKLN  | 1041 |
| ALB01040.1                | -TKNC DK EKDKSKSQSCNTAVVVVNVPSPLGNTPHGYKYACQCKIPTTEETCDDRKEYMNQWI IDTSKKQKGSSTNNDYELTYNGSEVKMSQKKLNSPKLD   | 1043 |
| ETW41644.1                | TTKNC DKDKKSKSQPINISVVVVNVPSPLGNTPHGYKYACQCKIPTTEESCDDRKEYMNQWISDTSKNPKGSRSTNNDYELTYNGVQIKQAAGRSSSTKLD     | 1031 |
| ALB01043.1                | -TKNC DK EKDKSKSQSCNTAVVVVNVPSPLGNTPHGYKYACQCKIPTTEETCDDRKEYMNQWI IDTSKKQKGSSTNNDYELTYNGSEVKMSQKKLNSPKLD   | 1043 |
| EUT82883.1                | -TKNC DKDKKSKSQSCNTAVVVVNVPSPLGNTPHGYKYACECKIPTTEESCDDRKEYMNQWISDTSKKQKGS GSKDYELTYNGVDVKPTTVRSSTKLD       | 1018 |
| ALB01038.1                | TTKNC DIQKDKSKSQSCDILVVVVNVPSPLGNTPHGYKYACQCKIPTTEESCDDRKEYMNQWSSCGSAQTVRG-RSGKDYELCKYNGVKETKLPKKLNSPKLD   | 1001 |
| ALB01058.1                | TTKNC DIQKDKSKSQSCDILVVVVNVPSPLGNTPHGYKYACQCKIPTTEESCDDRKEYMNQWSSCGSAQTVRG-RSGKDYELCKYNGVKETKLPKKLNSPKLD   | 1001 |
| ALB01059.1                | --EKC�KETDKSKSQSCDILVVVVNVPSPLGNTPHGYKYACQCRTPSNKELCDDRKEYMNQWSSSGSAQTVRDR-STNNDYELTYNGVQIKQATGTLKNSKLD    | 1010 |
| KNG76633.1                | --KNSDIQKKT PKSQSCNTAVVVVNVPSPLGNTPHGYKYACQCKIPTTEESCDDRKEYMNQWISDTSKKQKGSSTNNDYELTYNGVDVKPTTVRSSTKLD      | 1005 |
| ALB01051.1                | --KNC DIQKDKSKSQSCNTAVVVVNVPSPLGNTPHGYKYACECKTPSNKQESDDRKEYMNQWISDTSKNPKGGRSTNNDYELCKYNGVDVKPTTVRSSTKLD    | 1021 |
| ALB01049.1                | --KNC DKDKKSKLQCCNTAVVVVNVPSPLGNTPHGYKYACECKIPTTEESCDDRKEYMNQWSSSGSAQTVRDR-SGKDYELTYNGVDVKPTTVRSSTKLD      | 1003 |
| EWG75604.1                | --EKC�KERDKSKSQSCDILVVVVNVPSPLGNTPHGYKYACECKTPSNKQESDDRKEYMNQWISDNTKNPKGSGSKDYELCKYNGVKETKLPKKSSTKLD       | 1014 |
| ALB01045.1                | --KNC DIQKKT PKSQSCNTAVVVVNVPSPLGNTPHGYKYACECKIPTTEETCDDRKEYMNQWISDNTKNPKGSGSTNNDYELTYNGVKETKLPKKSSTKLD    | 1034 |
| ALB01047.1                | --KNC DKDKKSKSQSSNTAVVVVNVPSPLGNTPHGYKYACQCKIPTTEETCDDRKEYMNQWISDTSKKQKGSSTNNDYELTYNGVKETKPLGTLKNSKLD      | 1022 |
| 7G8.pro                   | TTKNC DIQKDKSKSQSSDILVVVVNVPSPLGNTPHGYKYACQCKIPTTEETCDDRKEYMNQWSSCGSARTMVKR-GYKNDNYELCKYNGVDVKPTTVRSSTKLD  | 1022 |
| 124_8.pro                 | --TEKCNKETDKSKSQSCNTAVVVVNVPSPLGNTPHGYKYACECKIPTTEETCDDRKEYMNQWISDTSKKPKGGRSTNNDYELTYNGVKETKLPKKSSTKLD     | 1028 |
| indo.pro                  | --KNC DKDKKSKSQSCDILVVVVNVPSPLGNTPHGYKYACECKTPSNKQESDDRKEYMNQWISDNTKNPKGSGSKDYELTYNGVDVKPTTVRSSTKLD        | 1027 |
| KMWII.pro                 | -TEKCNKDKKSKSQSCNTAVVVVNVPSPLGNTPHGYKYACQCKIPTTEETCDDRKEYMNQWISDTSKKQKGSSTNNDYELTYNGVKETKLPKKLNSPKLD       | 1029 |
| M24.pro                   | TTEKCNKERDKSKSQSSNTAVVVVNVPSPLGNTPHGYKYACQCKIPTNEETCDDRKEYMNQWISDTSKNPKGSGSTNNDYELTYNGVKETKLPKKLNSPKLD     | 1044 |
| MTS1.pro                  | TTEKCNKETDKSKSQSSNTAVVVVNVPSPLGNTPHGYKYACECKIPTTEETCDDRKEYMNQWSSCGSAQTVRD-RSGKDYELCKYNGVQIKQAAGTLKNSKLD    | 1037 |
| P13.pro                   | --KNC DIKKTTPK PQSCDILVVVVNVPSPLGNTPHGYKYACQCRTPSNKQESDDRKEYMNQWSSSGSAQTVRG-RSTNNDYELTYNGVKETKLPKKLNSPKLD  | 1036 |
| T2C6.pro                  | --ENCDIQKKT PKSQSCDILVVVVNVPSPLGNTPHGYKYACQCRTPSNKQESDDRKEYMNQWISDNTKNPKGSGSKDYELCKYNGVKETKPLGTLKNSKLD     | 1026 |
| V1_S.pro                  | TTKNC DIQKDKSKSQPINISVVVVNVPSPLGNTPHGYKYACECKIPTTEESCDDRKEYMNQWSSCGSARTMVKR-GYKNDNYELCKYNGVDVKPTTVRSNSTKLD | 1018 |
| WR80.pro                  | --EKC�KERDKSKSQSSDILVVVVNVPSPLGNTPHGYKYACQCKIPTTEETCDDRKEYMNQWISDTSKNPKGSGSTNNDYELTYNGSEVKMSQKKLNSPKLD     | 1031 |
| PFL0030cexon1+2.pro       | --EKC�KETDKSKLQCCNTAVVVVNVPSPLGNTPHGYKYACQCKIPTNEETCDDRKEYMNQWSSCGSARTMVKR-GYKNDNYELCKYNGVDVKPTTVRSNSTKLD  | 1016 |
| A4PFL0030c exon1+2.pro    | -TEKCNKERDKSKSQSSDILVVVVNVPSPLGNTPHGYKYACQCKIPTNEETCDDRKEYMNQWSSCGSARTMVKR-GYKNDNYELCKYNGVDVKPTTVRSNSTKLD  | 1025 |
| Newdd2var2CSAsequence.pro | TTKNC DIQKDKTPK SQSCDILVVVVNVPSPLGNTPHGYKYACECKIPTTEETCDDRKEYMNQWSSCGSAQTVRG-RSGKDYELTYNGVKETKPLGTLKNSKLD  | 1014 |
| McPFL0030c.pro            | TTKNC DKERDKSKSQSCNTAVVVVNVPSPLGNTPHGYKYACECKTPSNKELCDDRKEYMNQWSSSGSAQTVRD-RSGKDYELTYNGVKETKLPKKLNSKLD     | 1042 |
| HB3-1var2CSA.pro          | -TKNC DIQKKT PK PQSCDILVVVVNVPSPLGNTPHGYKYVCECKIPTTEETCDDRKEYMNQWISDTSKKQKGSSTNNDYELTYNGVQIKQAAGTLKNSKLD   | 1028 |
| HB3-2var2CSA.pro          | TTKNC DIKKT PK SQPINISVVVVNVPSPLGNTPHGYKYACQCKIPTTEESCDDRKEYMNQWISDTSKKQKGSSTNNDYELTYNGVKETKLPKKSSTKLD     | 1039 |
